# Supplementary material for: A physics-based Antarctic melt detection technique: combining Advanced Microwave Scanning Radiometer 2, radiative-transfer modeling, and firn modeling
Source: Copernicus journal article supplement (doi:10.5194/tc-18-3613-2024), 2024-08-15

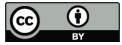

*Supplement of*

**A physics-based Antarctic melt detection technique: combining Advanced Microwave Scanning Radiometer 2, radiative-transfer modeling, and firn modeling**

**Marissa E. Dattler et al.**

*Correspondence to:* Marissa E. Dattler ([marissa.e.dattler@nasa.gov](mailto:marissa.e.dattler@nasa.gov))

The copyright of individual parts of the supplement might differ from the article licence.

Figure S1-S15: Melt detection for fifteen sites. (a) Brightness temperature from 19H from AMSR-2 (black line) with thresholding techniques from Zwally and Fiegles (1994; dashed dark blue line), Torinesi et al. (2003; dotted orange line), and Picard et al. (2022a; solid cyan line). (b) Microwave grain size computed from the Hybrid Method (19H; green line) along with  $\pm 4\overline{\sigma_{L_{MW}}}$  bounds. (c) AMSR-2 brightness temperature (19H; black line). Hybrid Method dry snow brightness temperature (19H; purple line) with propagated  $-4\overline{\sigma_{L_{MW}}}$  (grey bounds). Melt days detected by Hybrid Method (blue dots). (d) Melt days detected by Hybrid Method (blue dots). These represent melt days versus non-melt days in a binary fashion and do not reflect a specific melt volume. AWS surface energy balance melt data (black bars). Grey area represents time period where AWS-derived data are unavailable.

Figure S16-S30: Microwave grain size for fifteen sites. (a) Brightness temperature from 19H from AMSR-2 (black line) with thresholding techniques from Zwally and Fiegles (1994; dashed dark blue line), Torinesi et al. (2003; dotted orange line), and Picard et al. (2022a; solid cyan line). (b) Microwave grain size computed from the Hybrid Method (19V; green line) along with  $\pm 4\overline{\sigma_{L_{MW}}}$  bounds.



Site: AWS16 (Bias Corrected), Channel: 18H

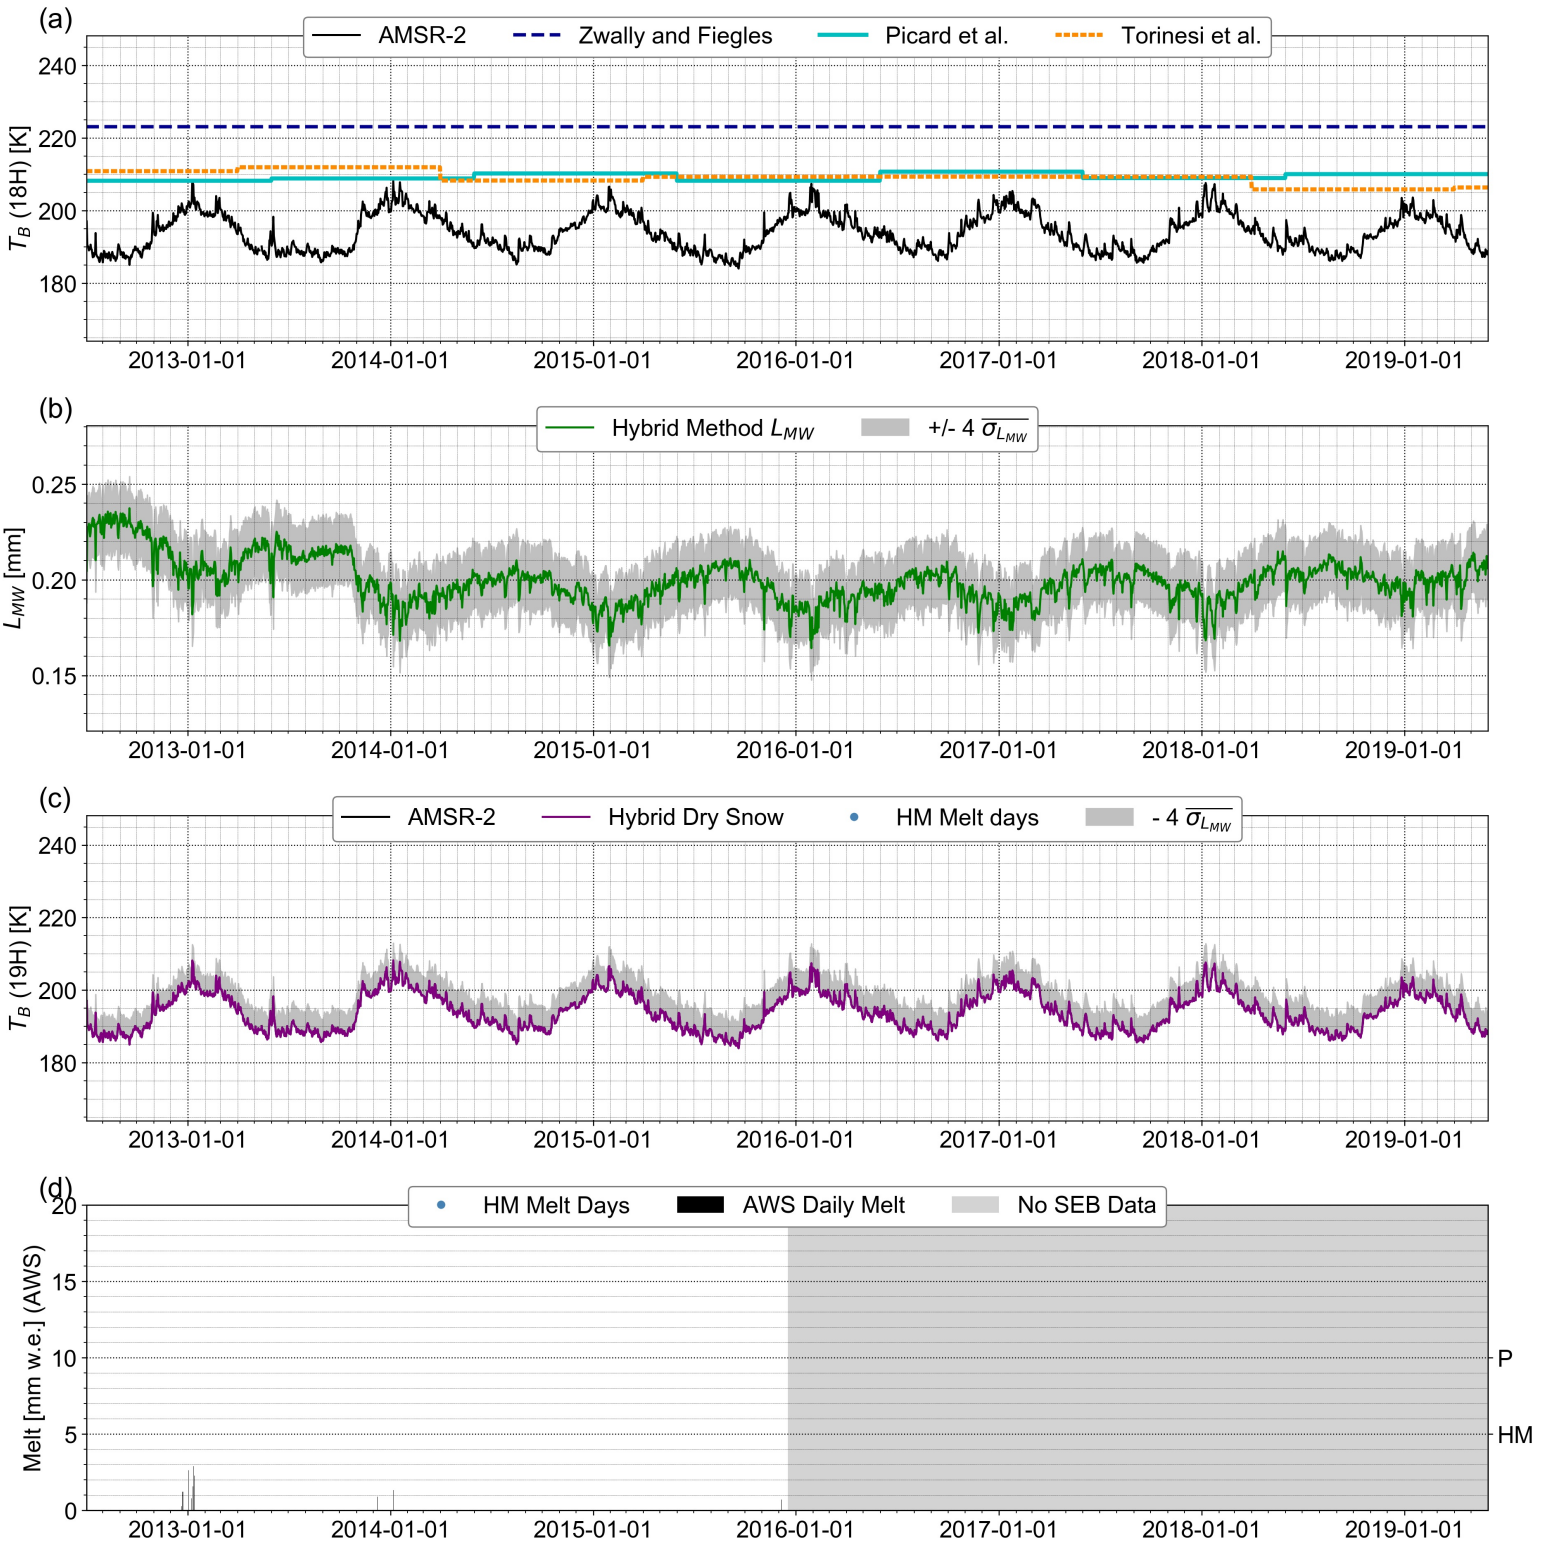

Site: Dome C (Bias Corrected), Channel: 18H

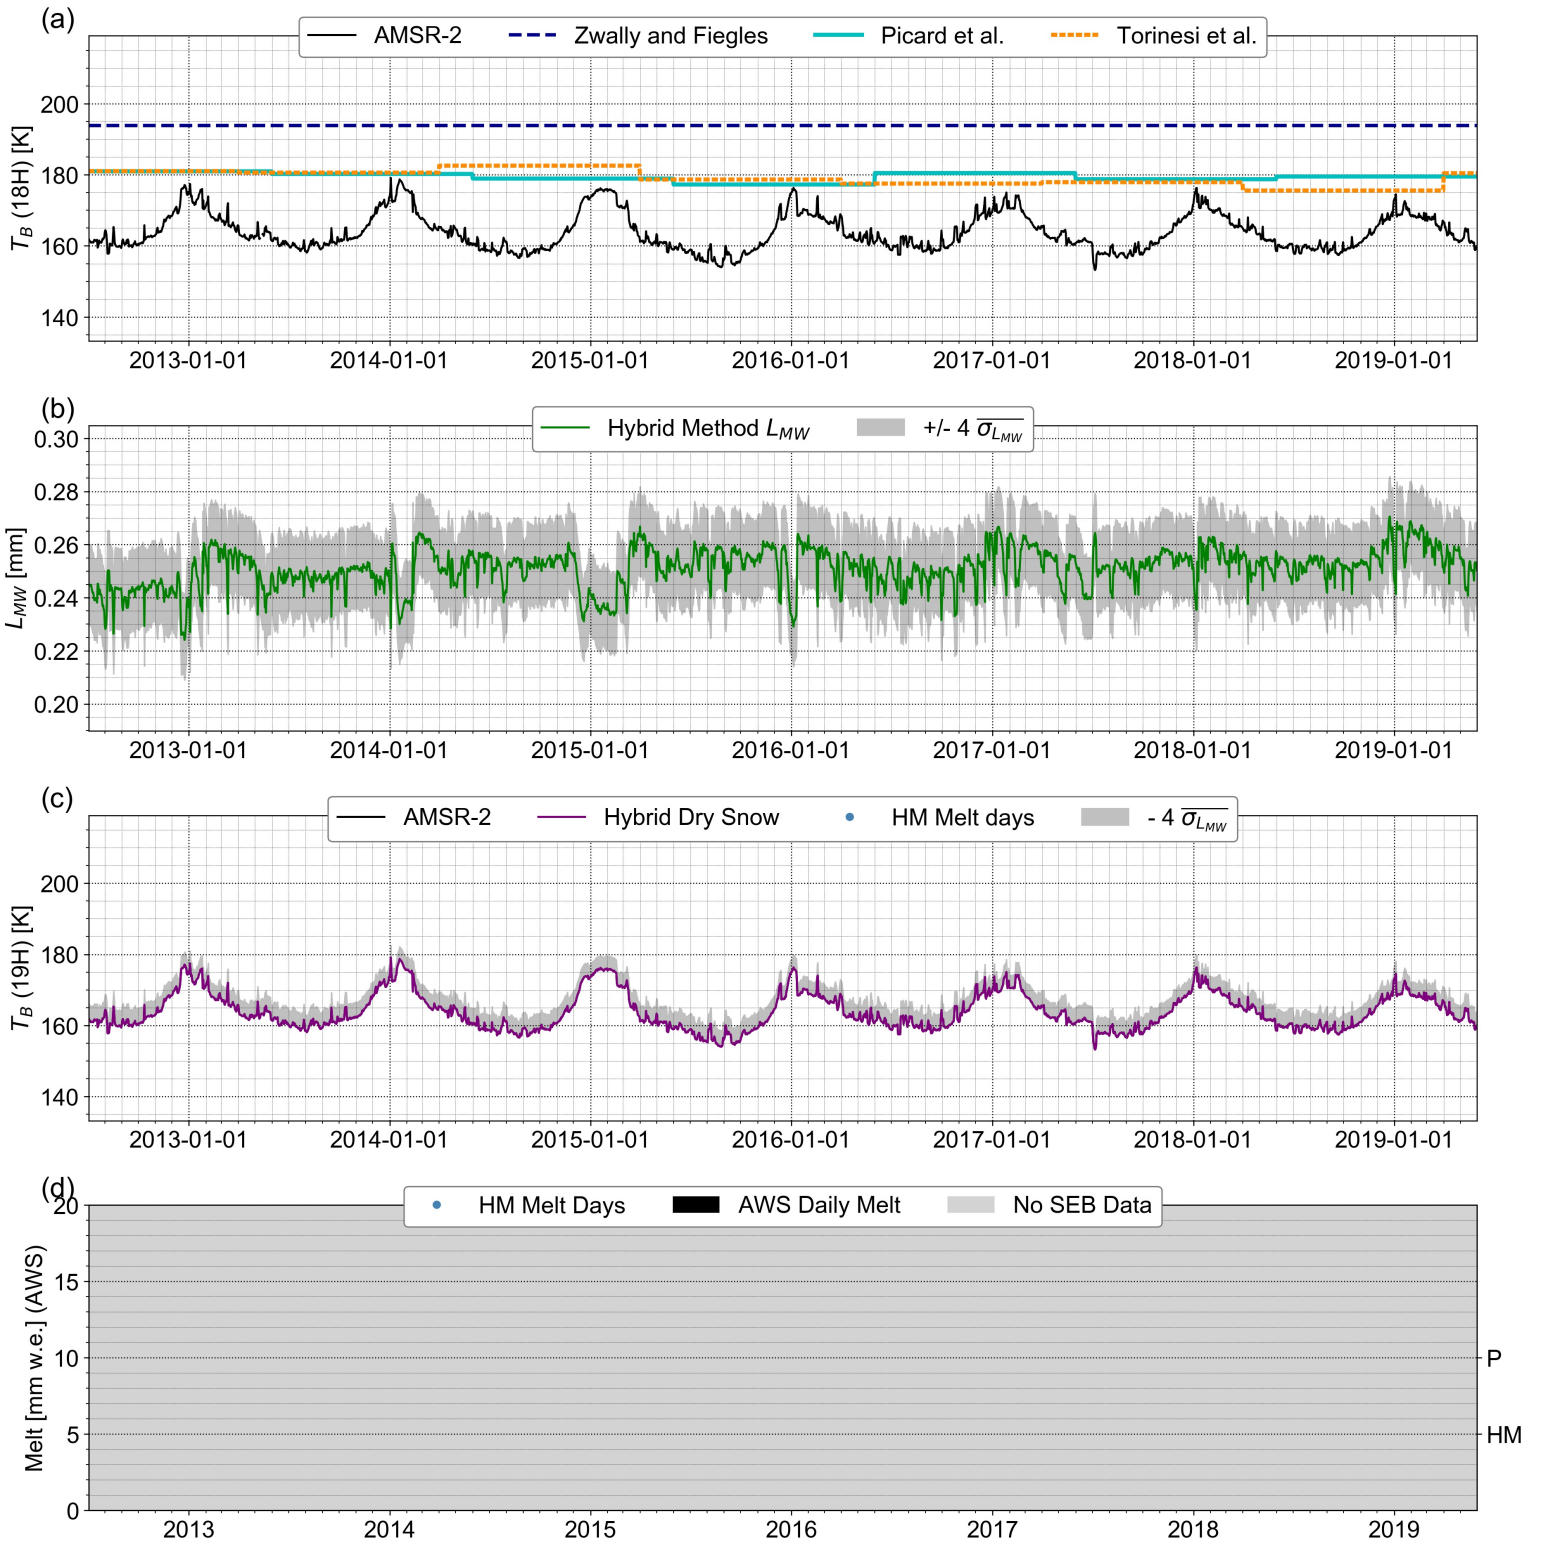

Site: AWS 19, Channel: 18H

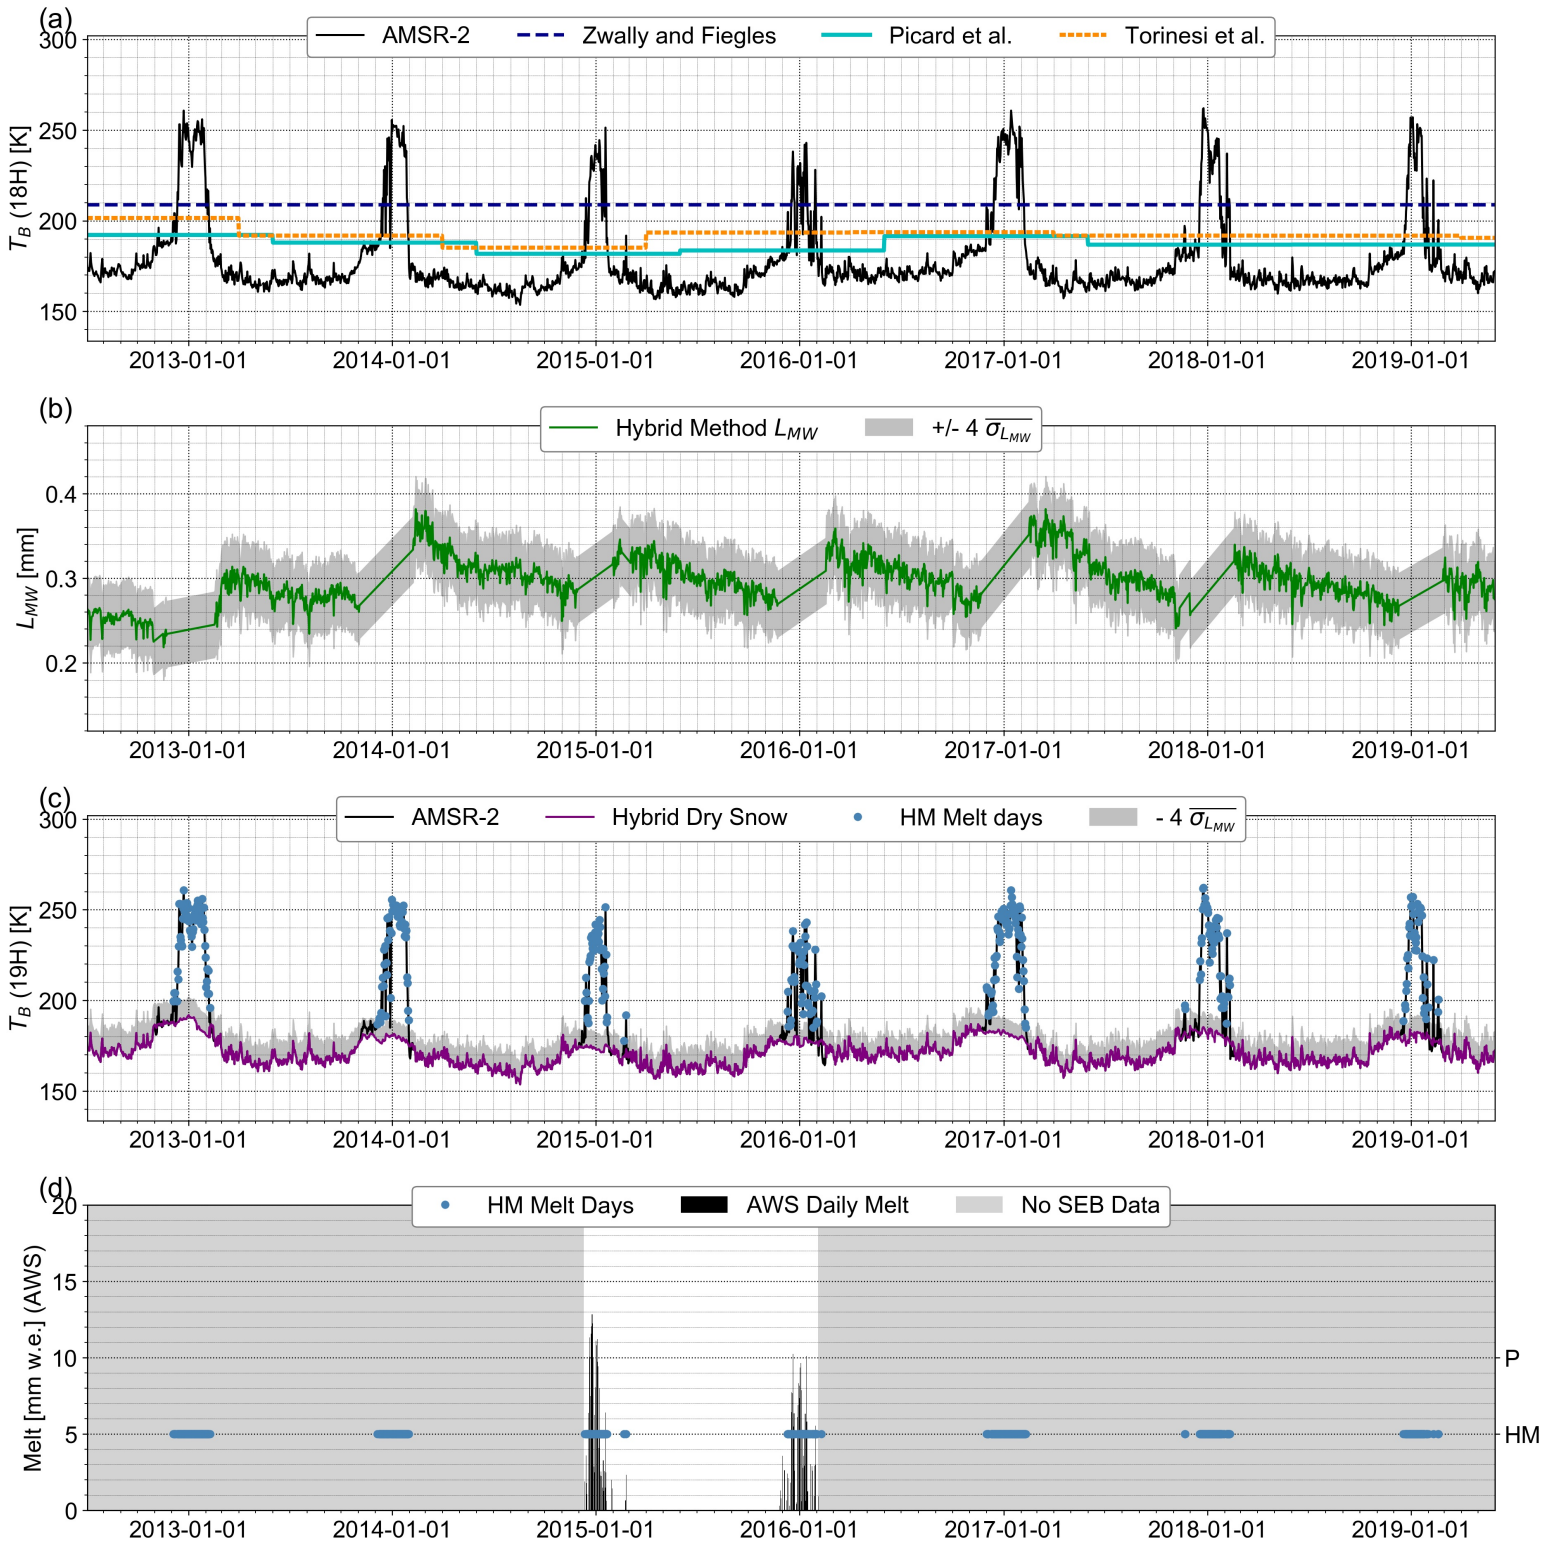



Site: AWS 15, Channel: 18H

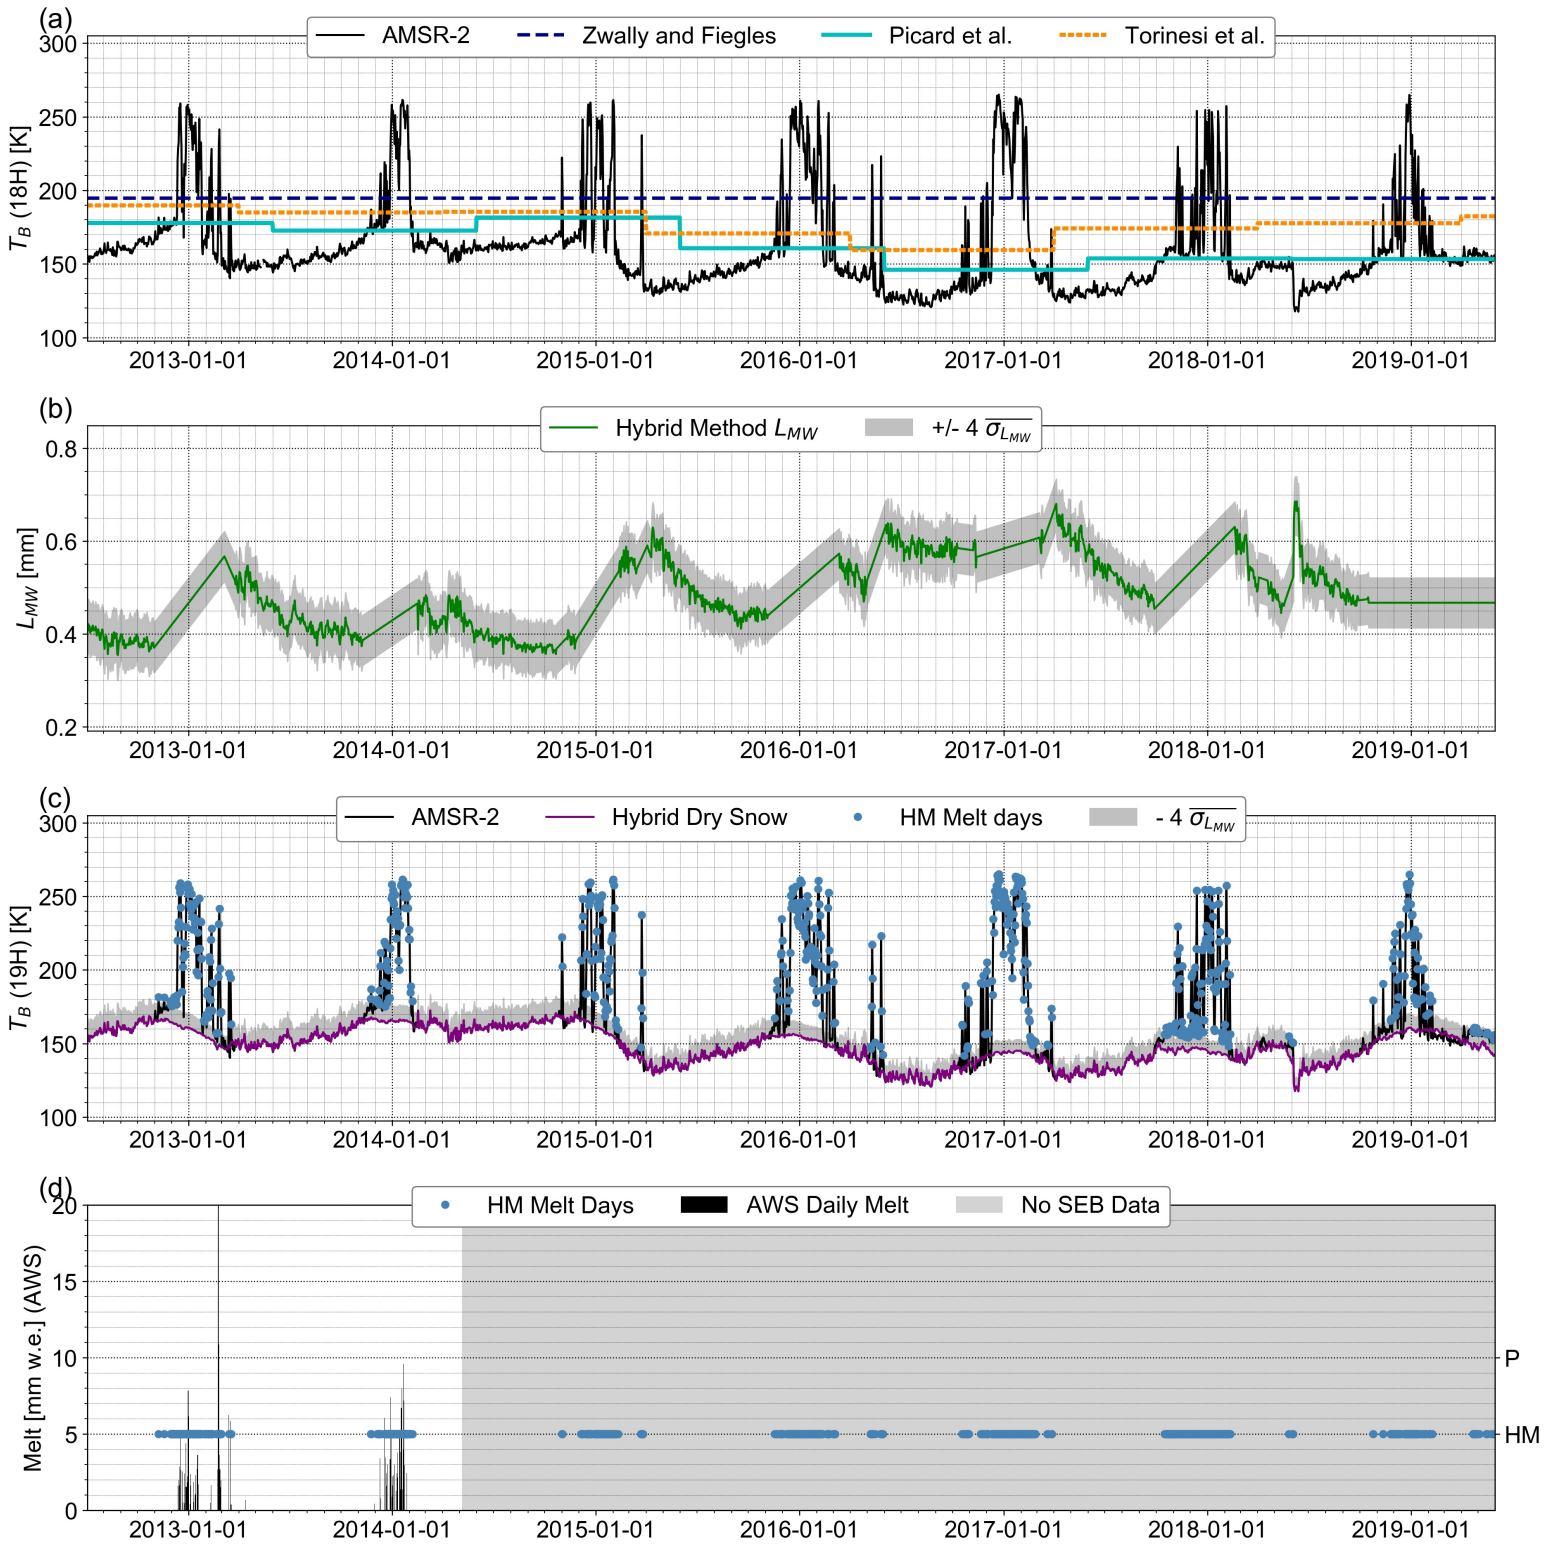

Site: AWS 16, Channel: 18H

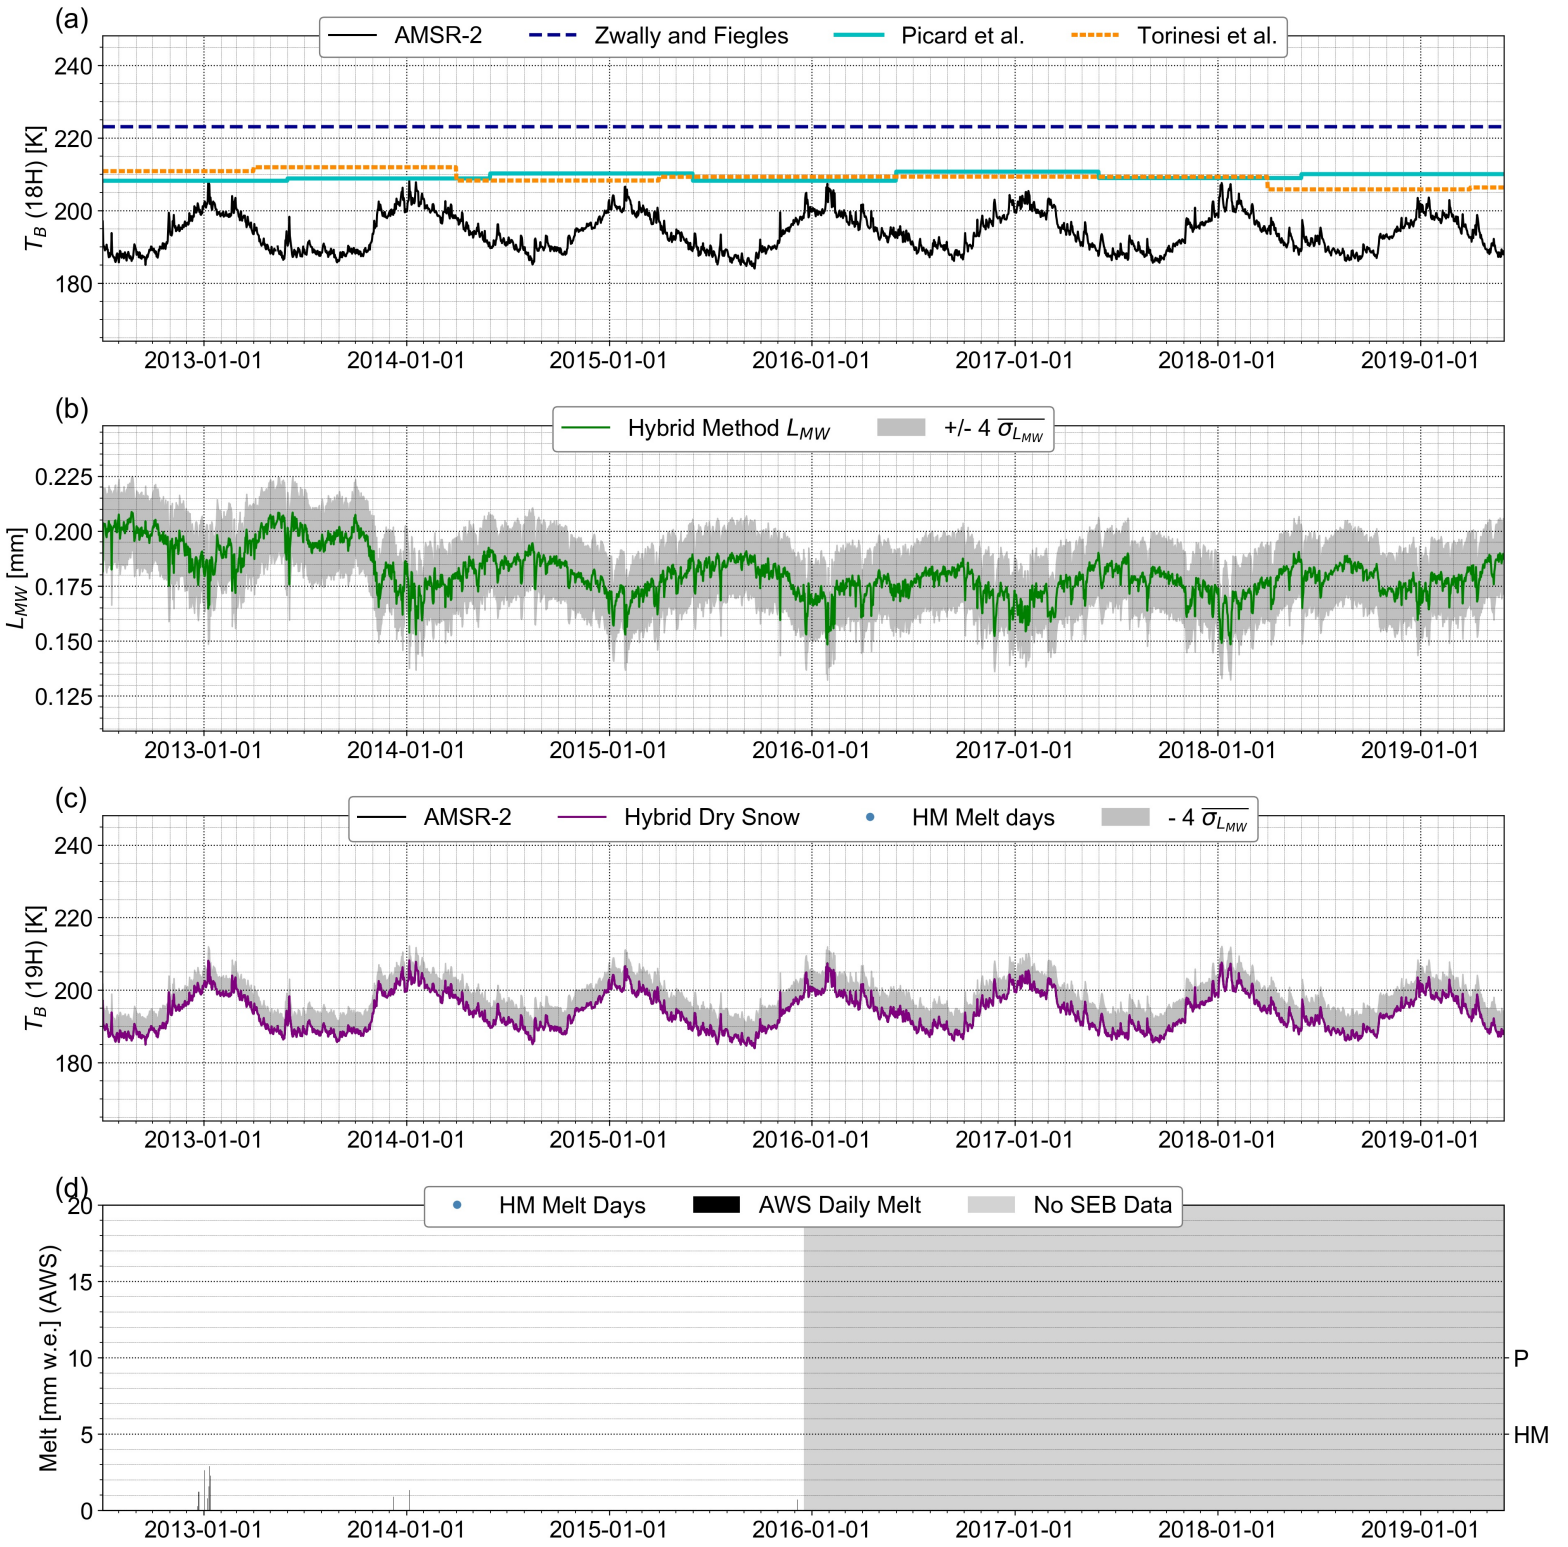

Site: Kohnen, Channel: 18H

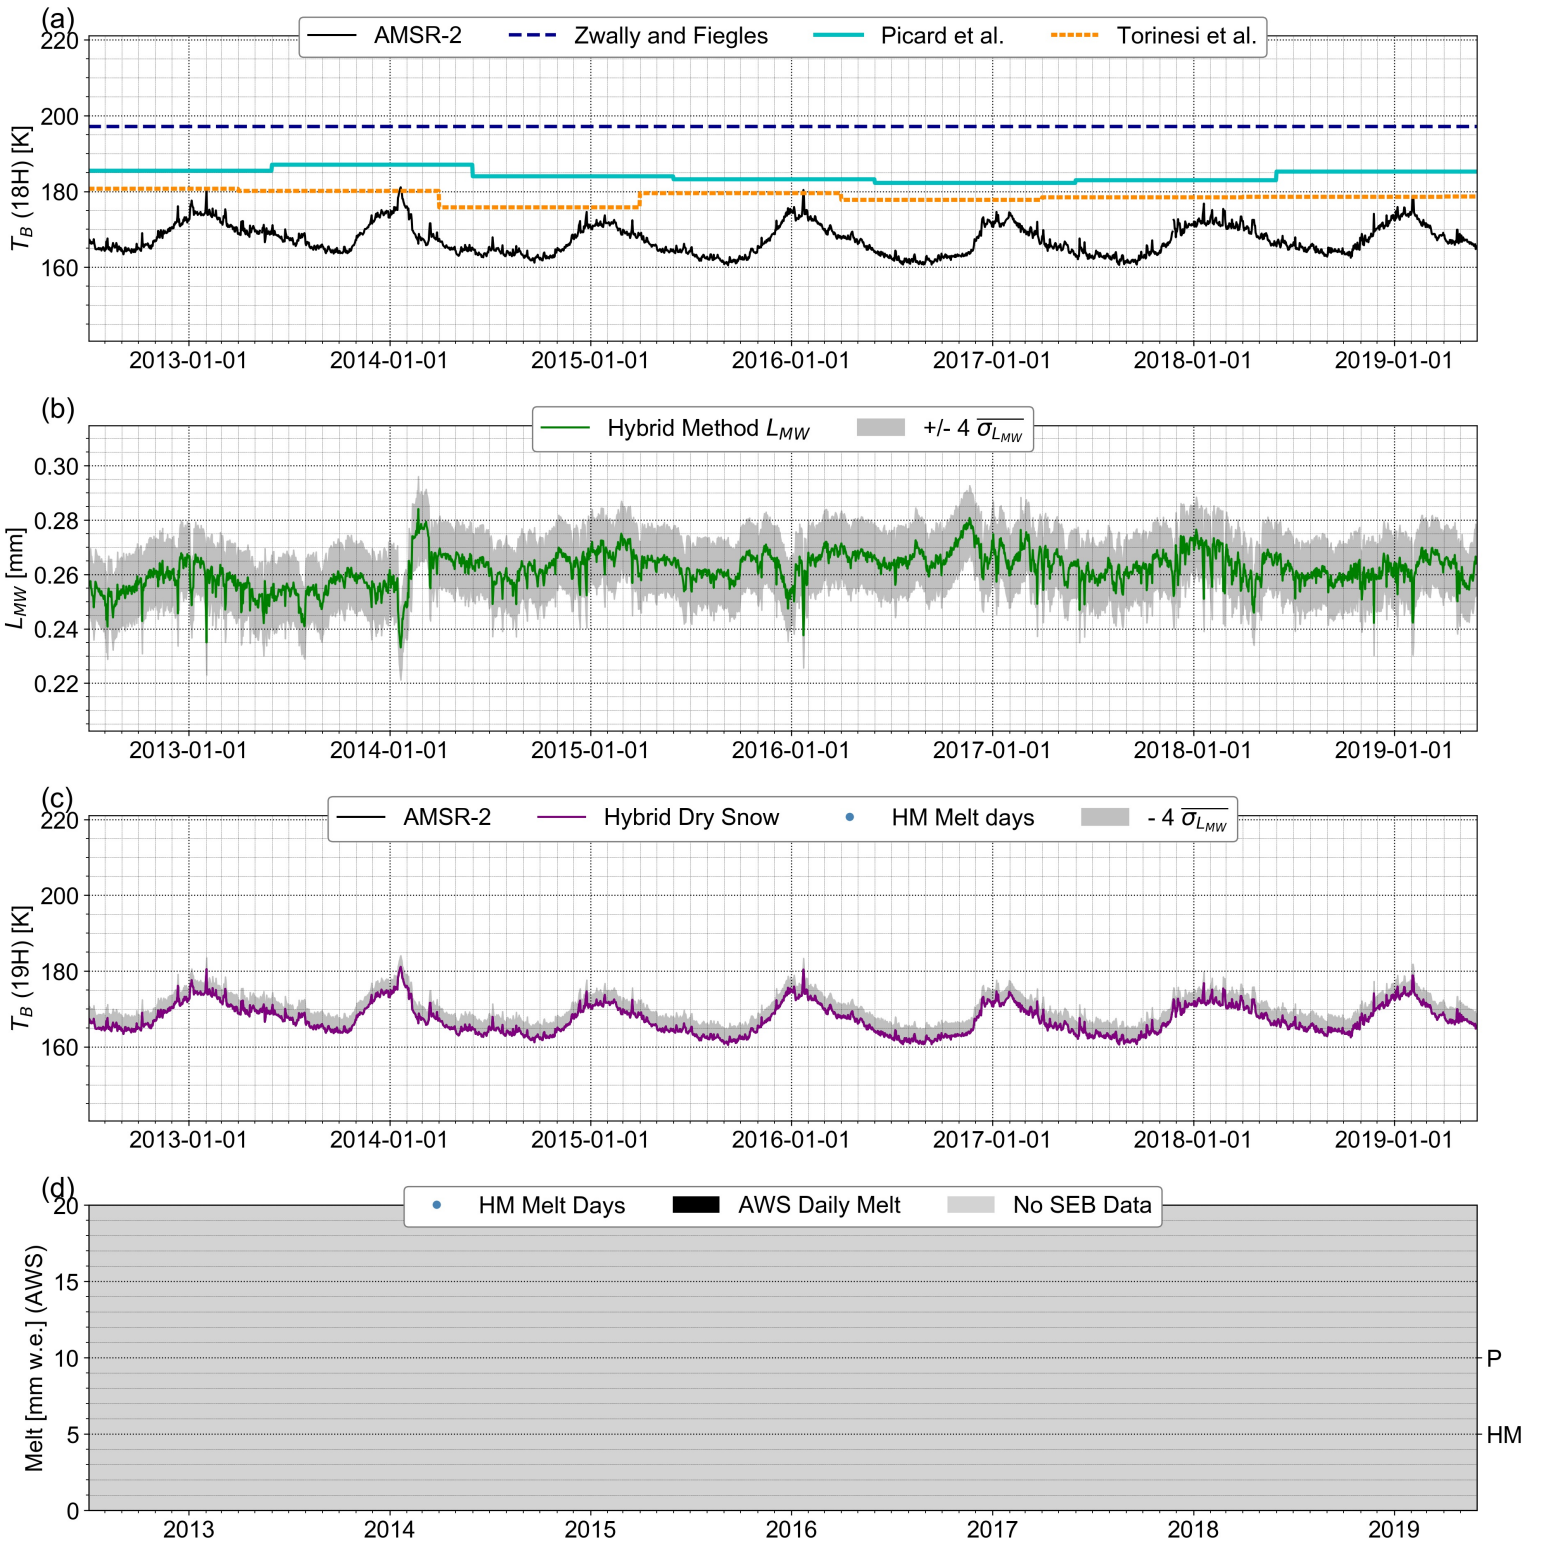



Site: Point Barnola, Channel: 18H

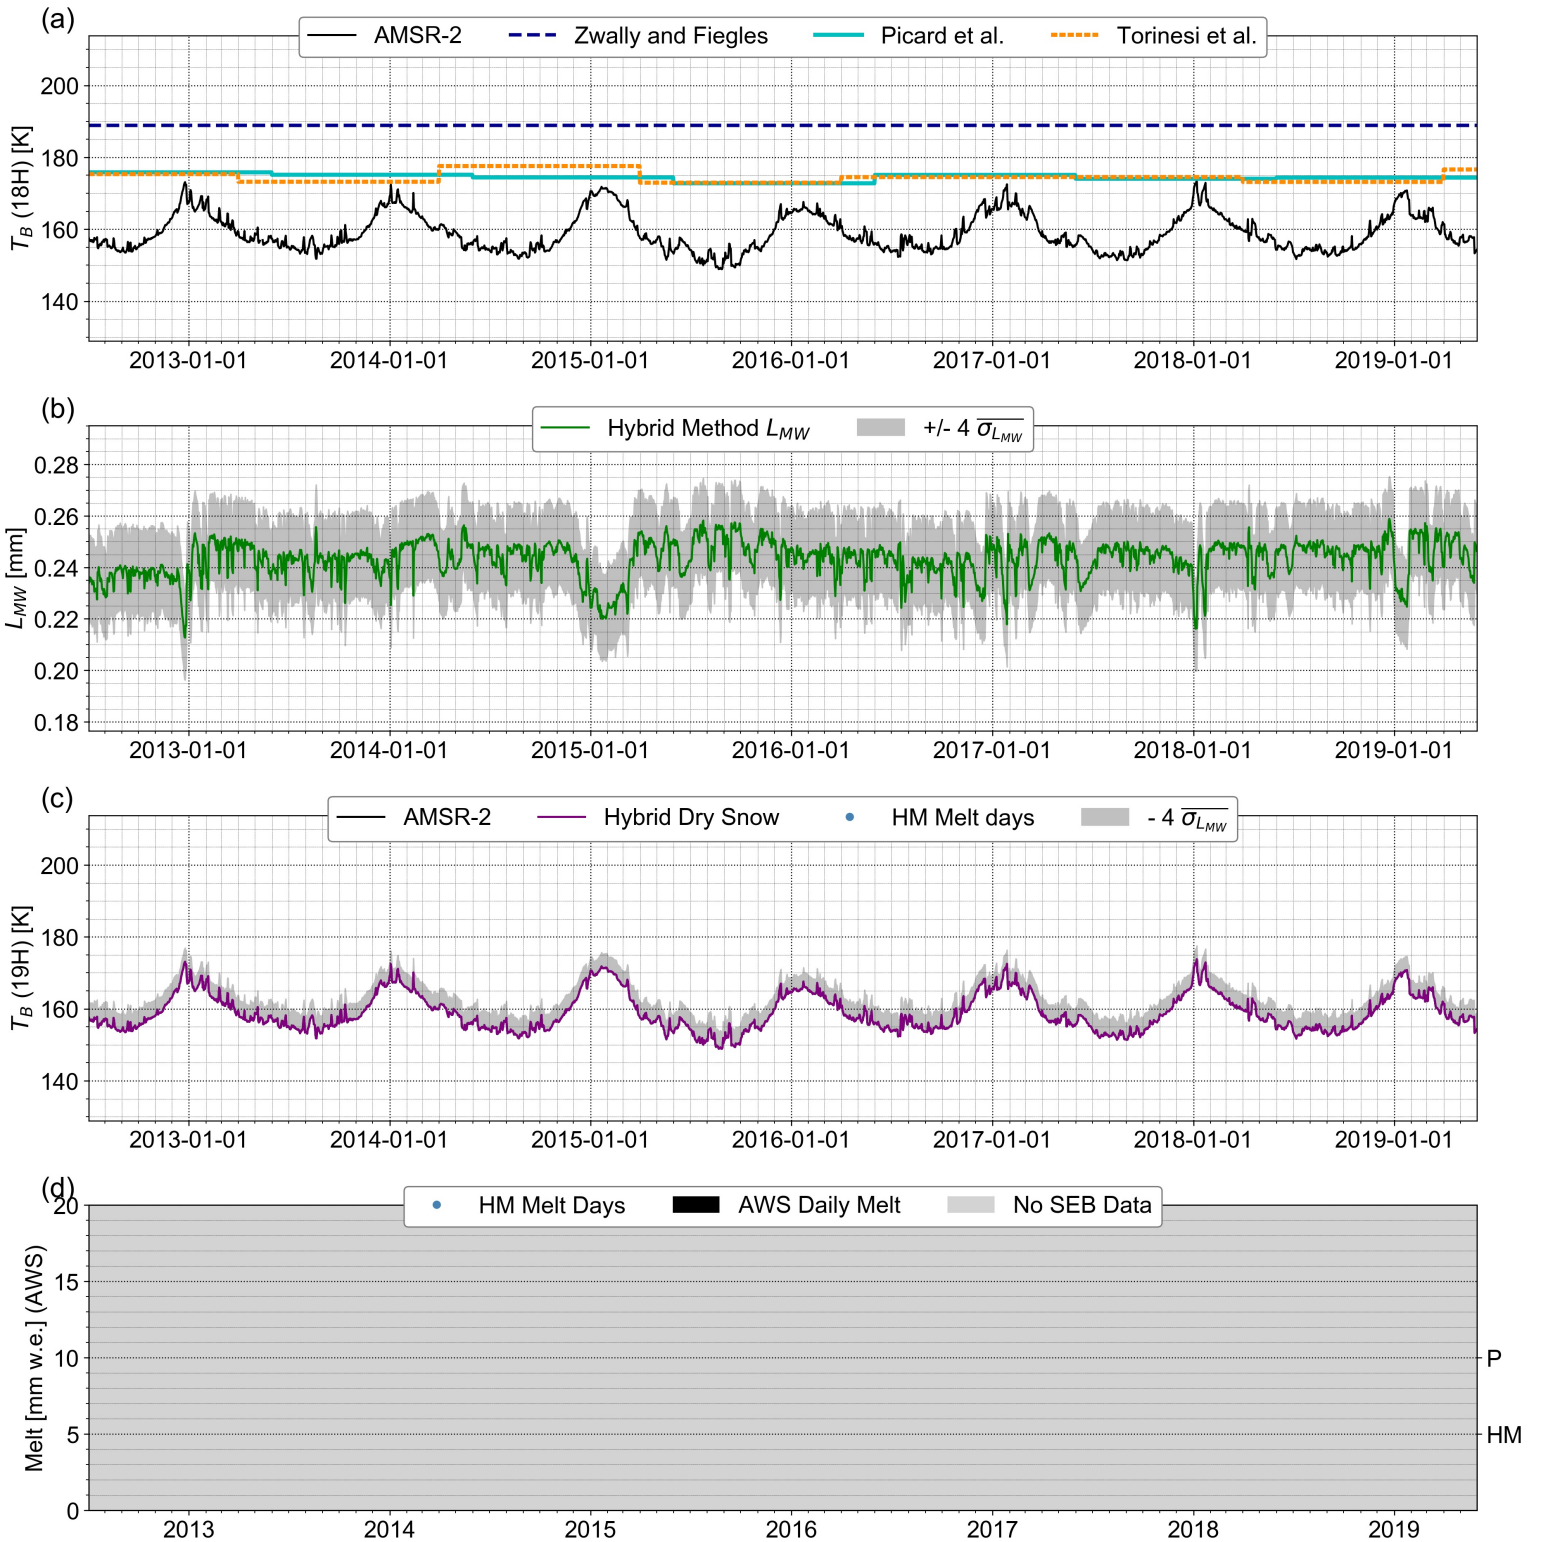

Site: Dome C, Channel: 18H

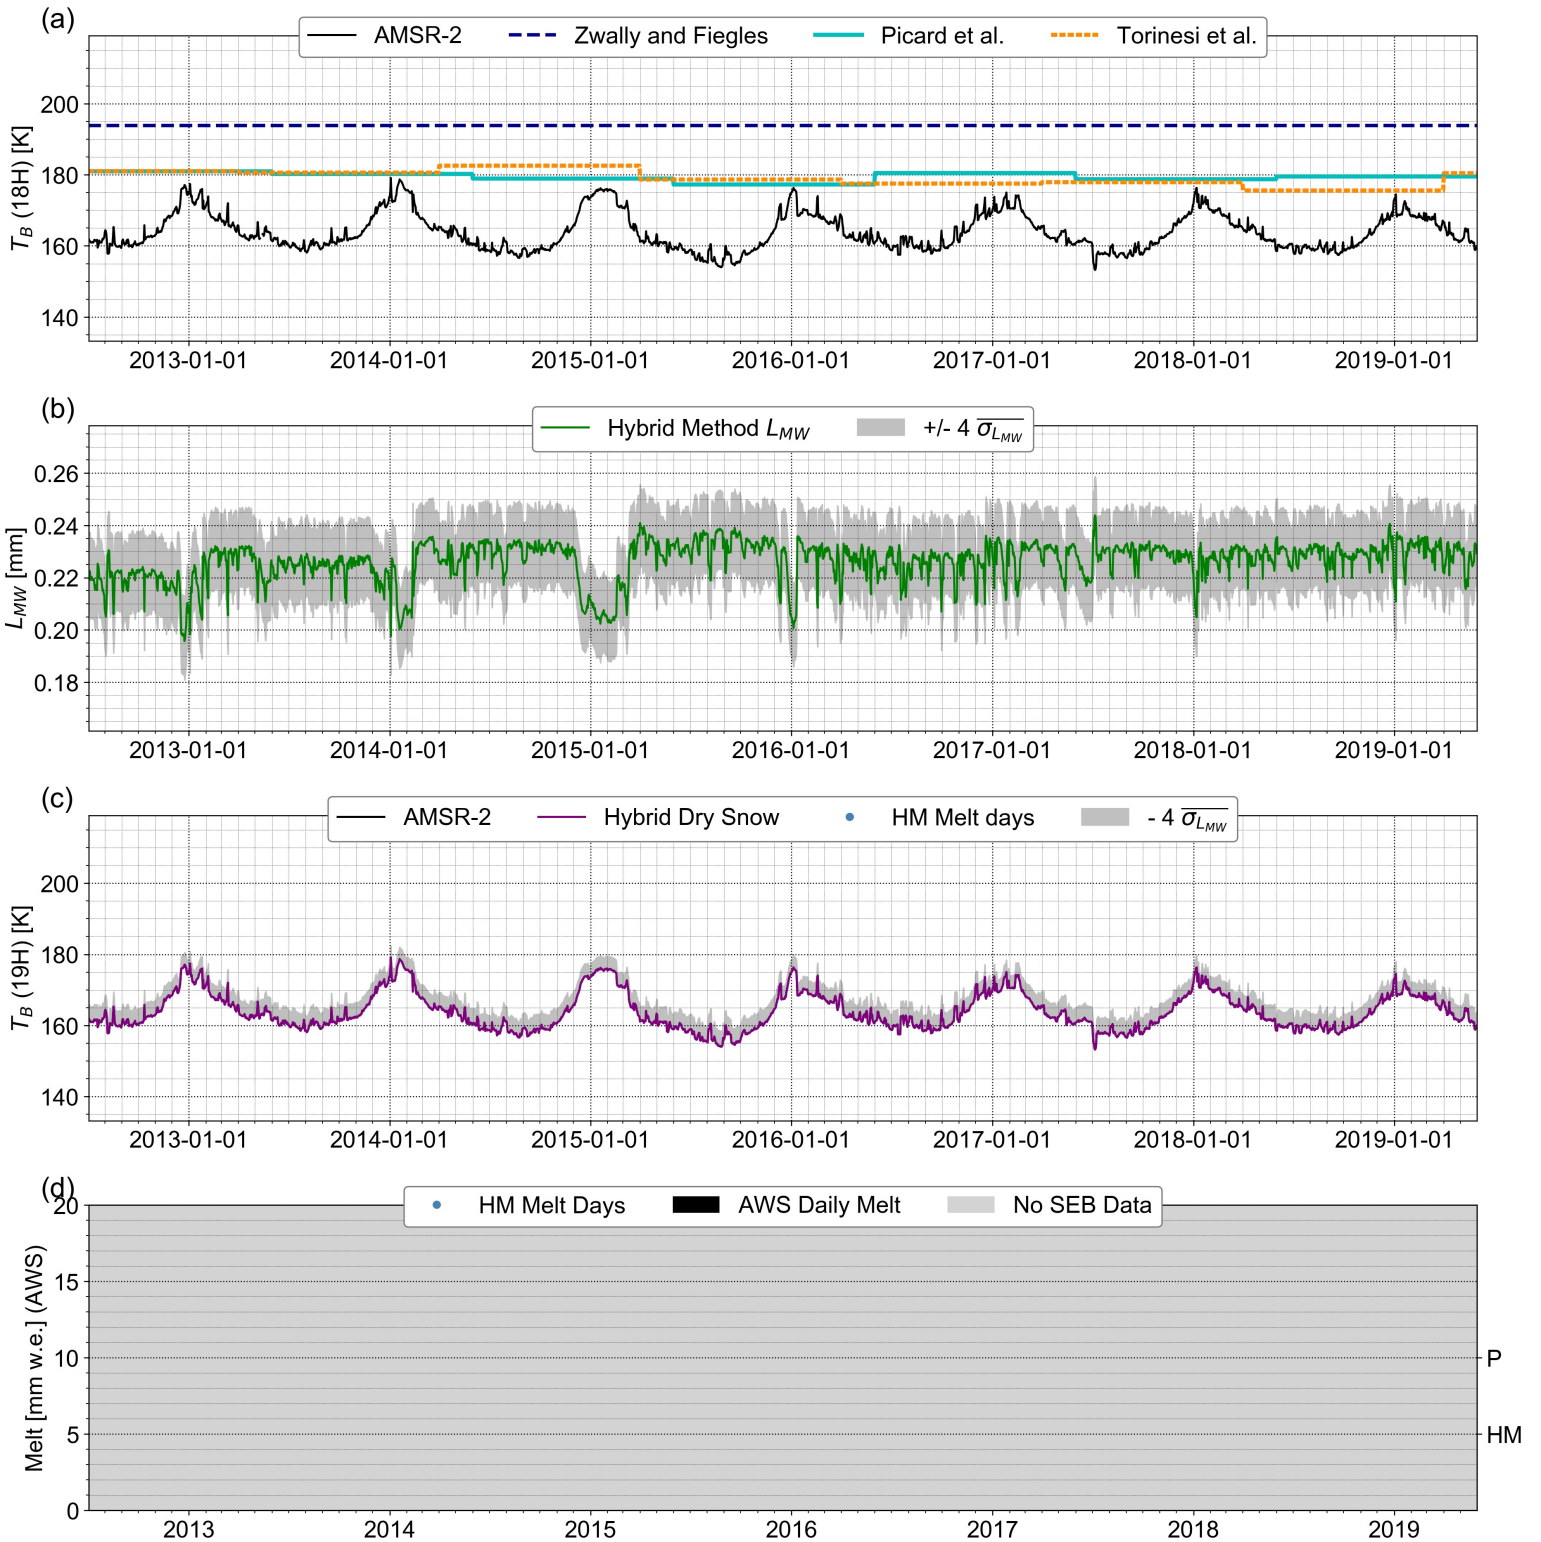



Site: AWS 17, Channel: 18H

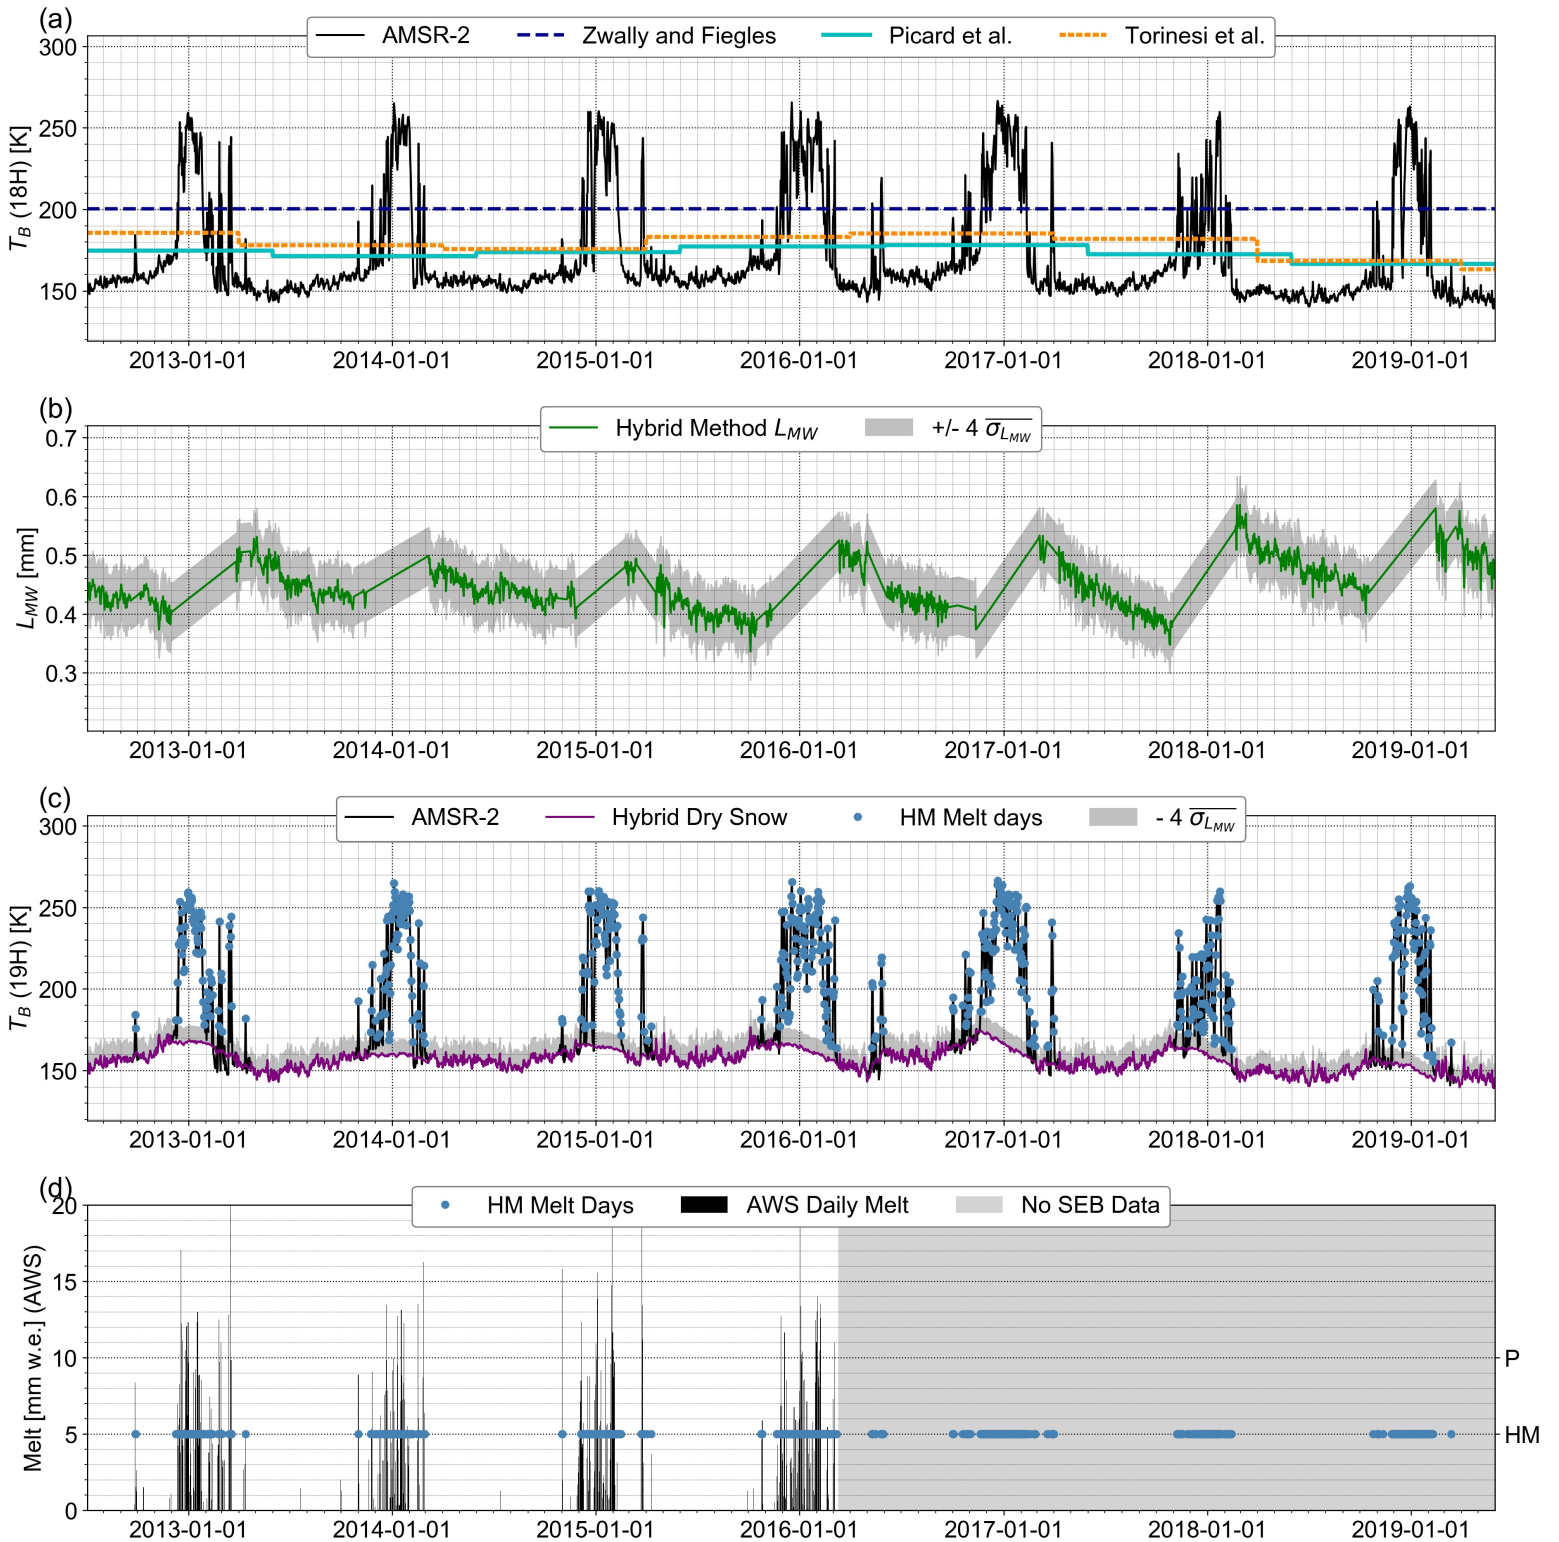

Site: AWS 14, Channel: 18H

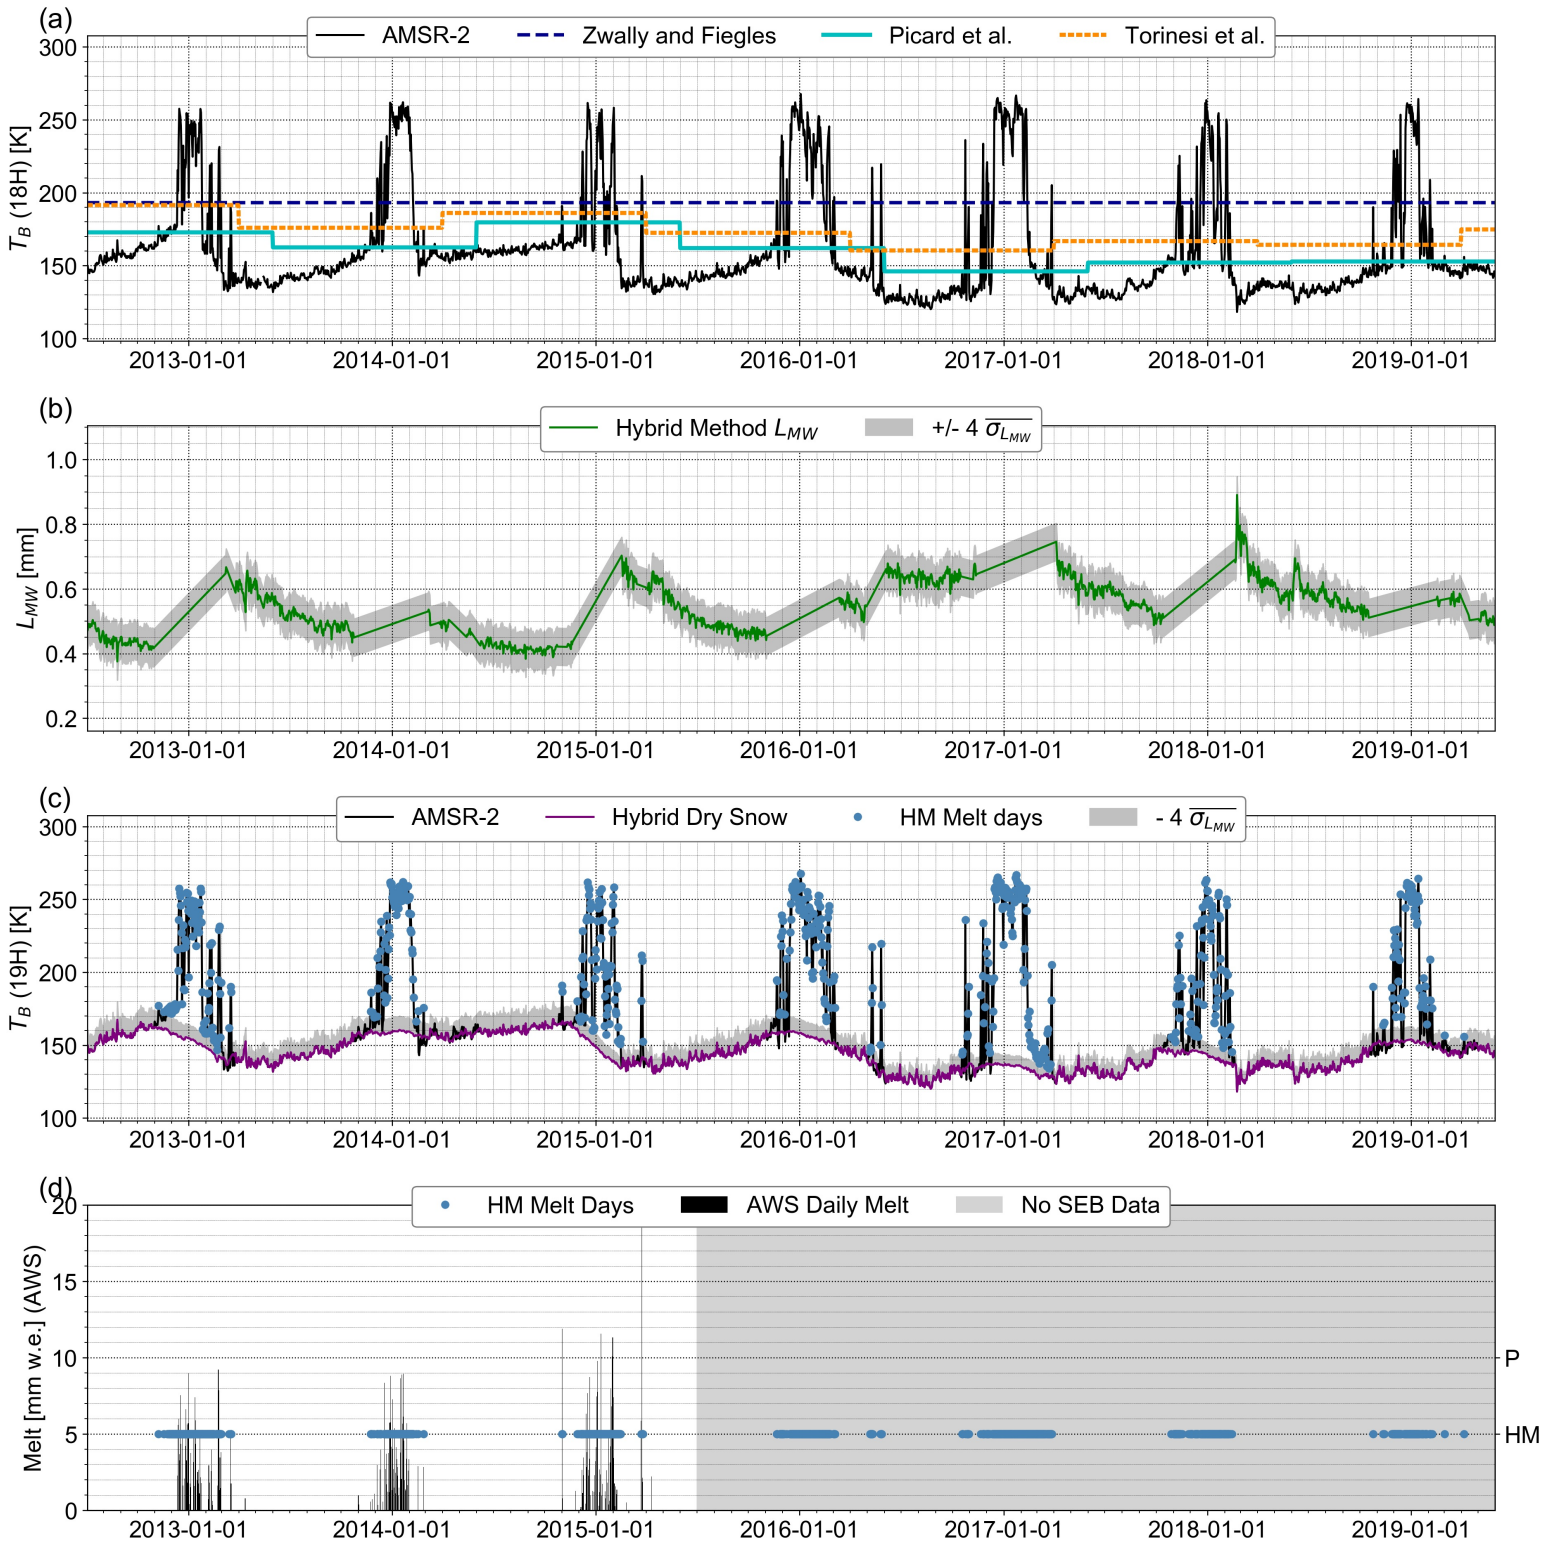

Site: AWS 6, Channel: 18H

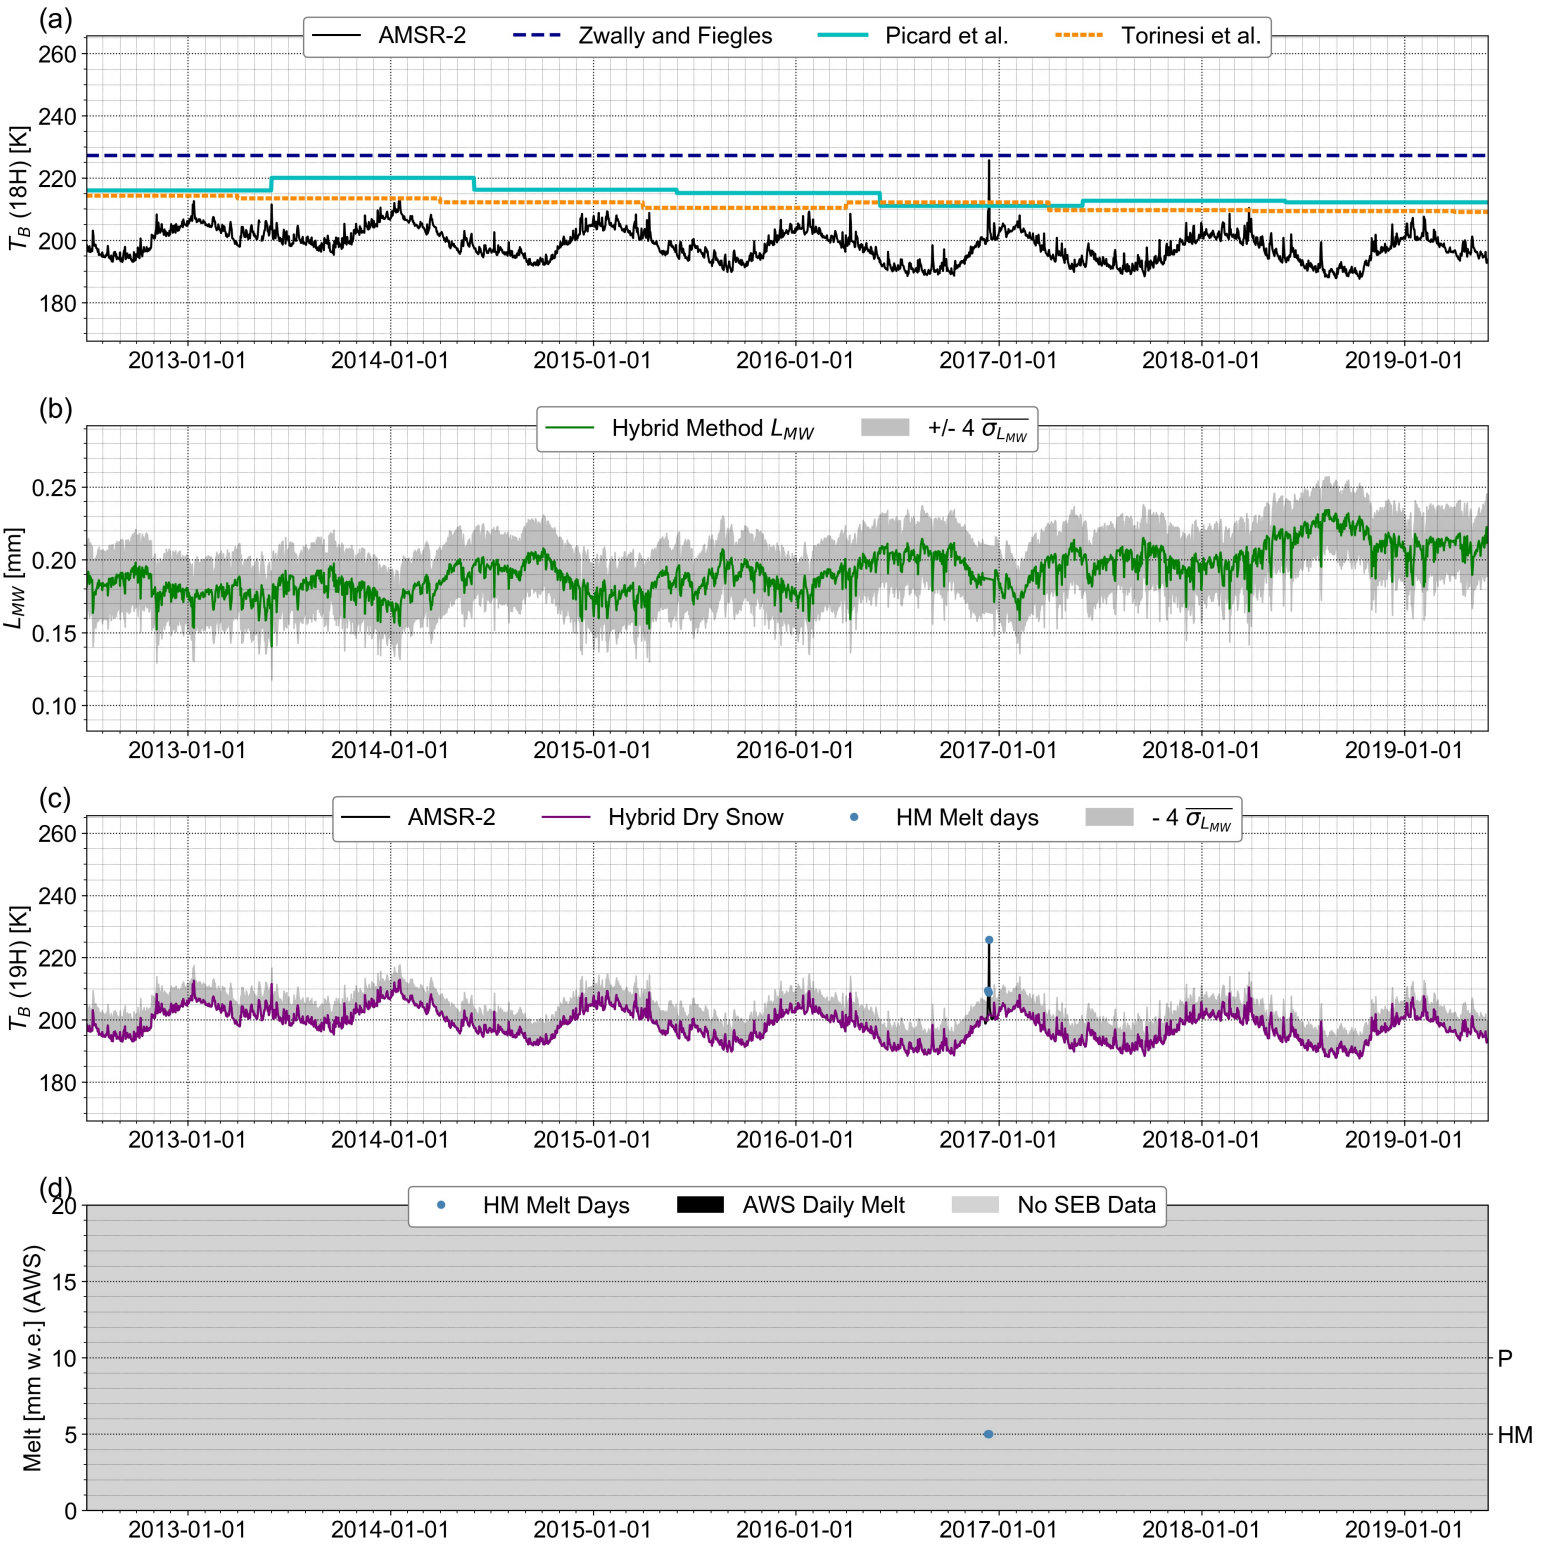



Site: AWS 11, Channel: 18H

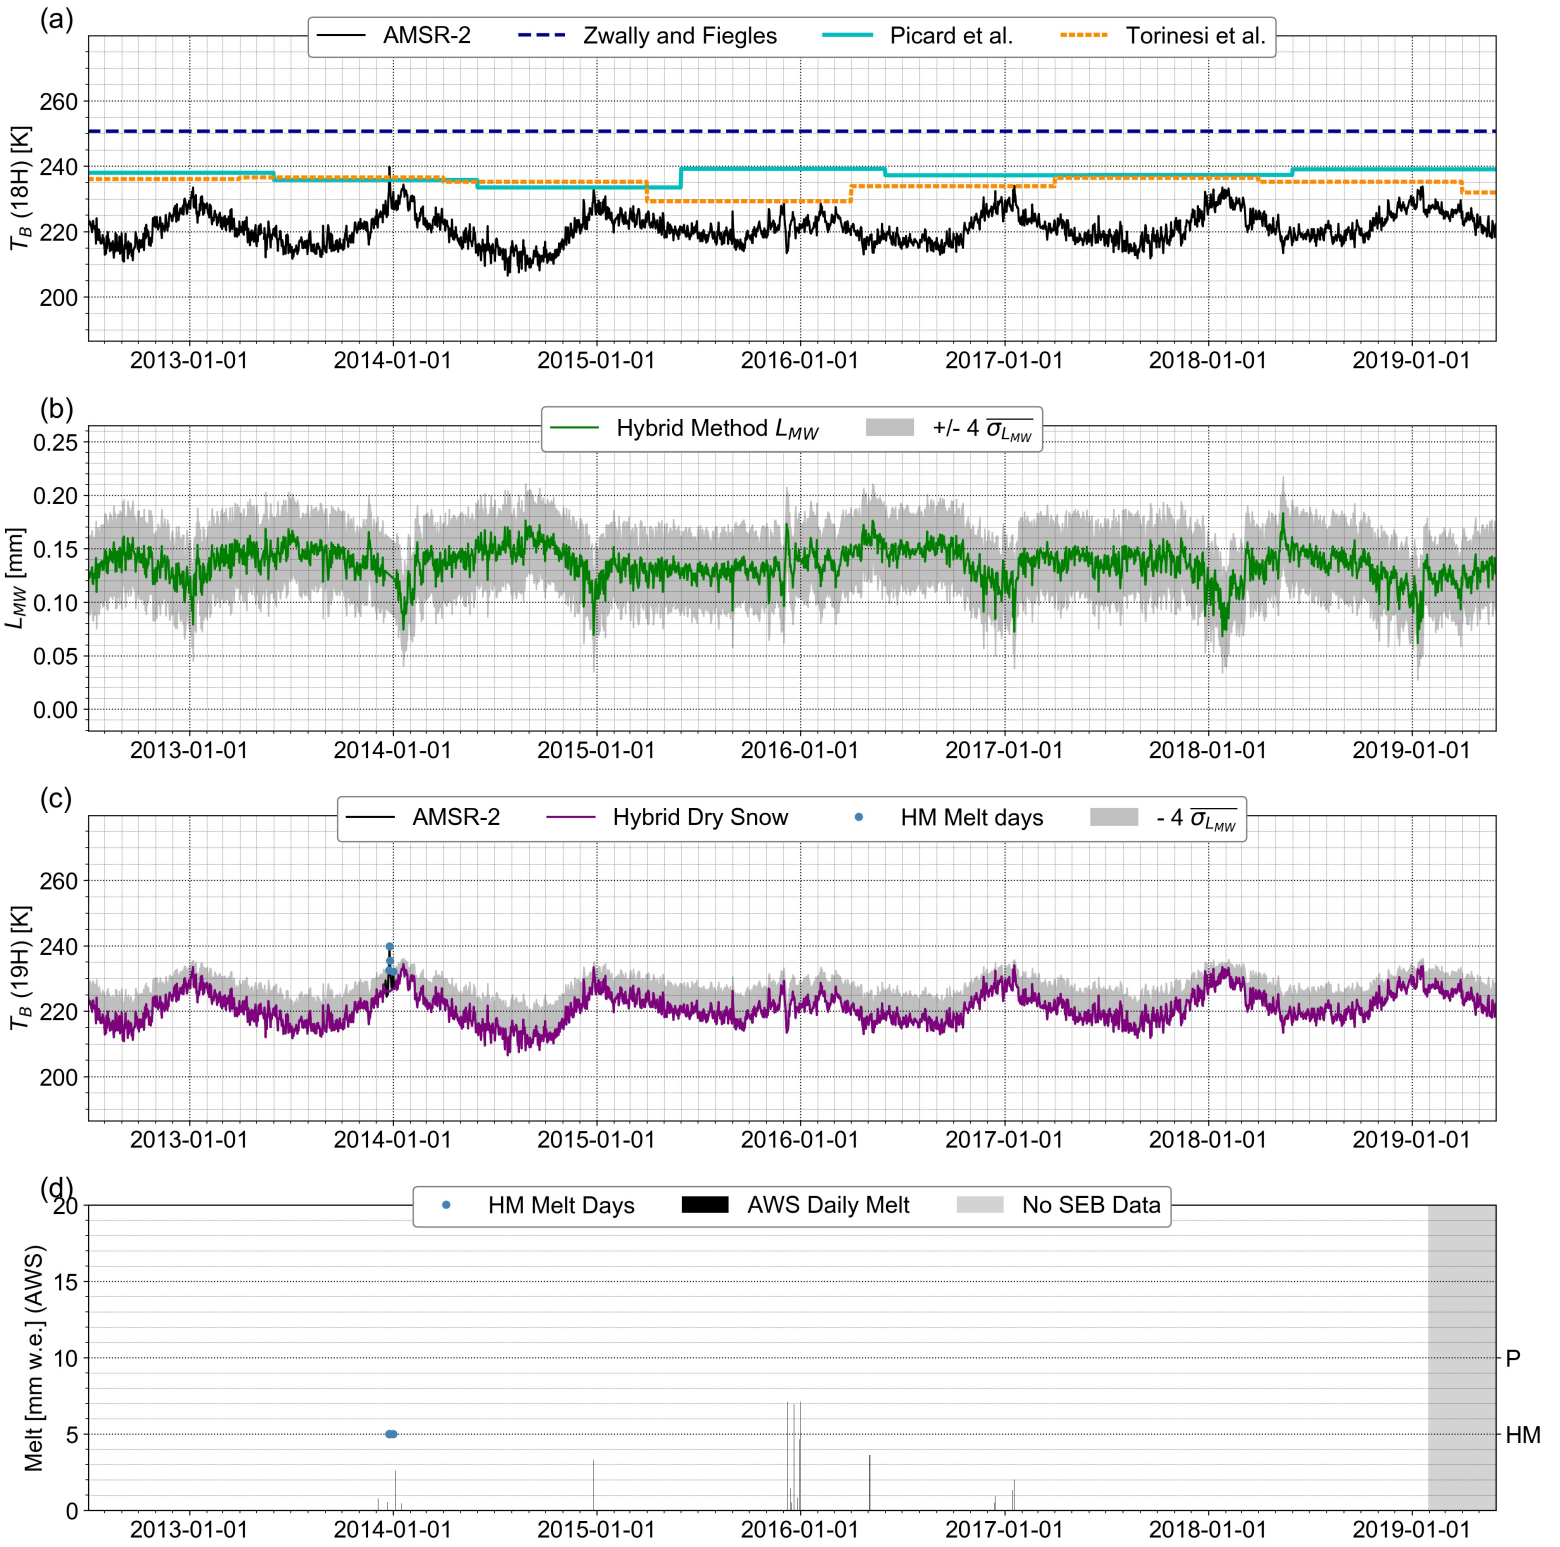

Site: AWS 4, Channel: 18H

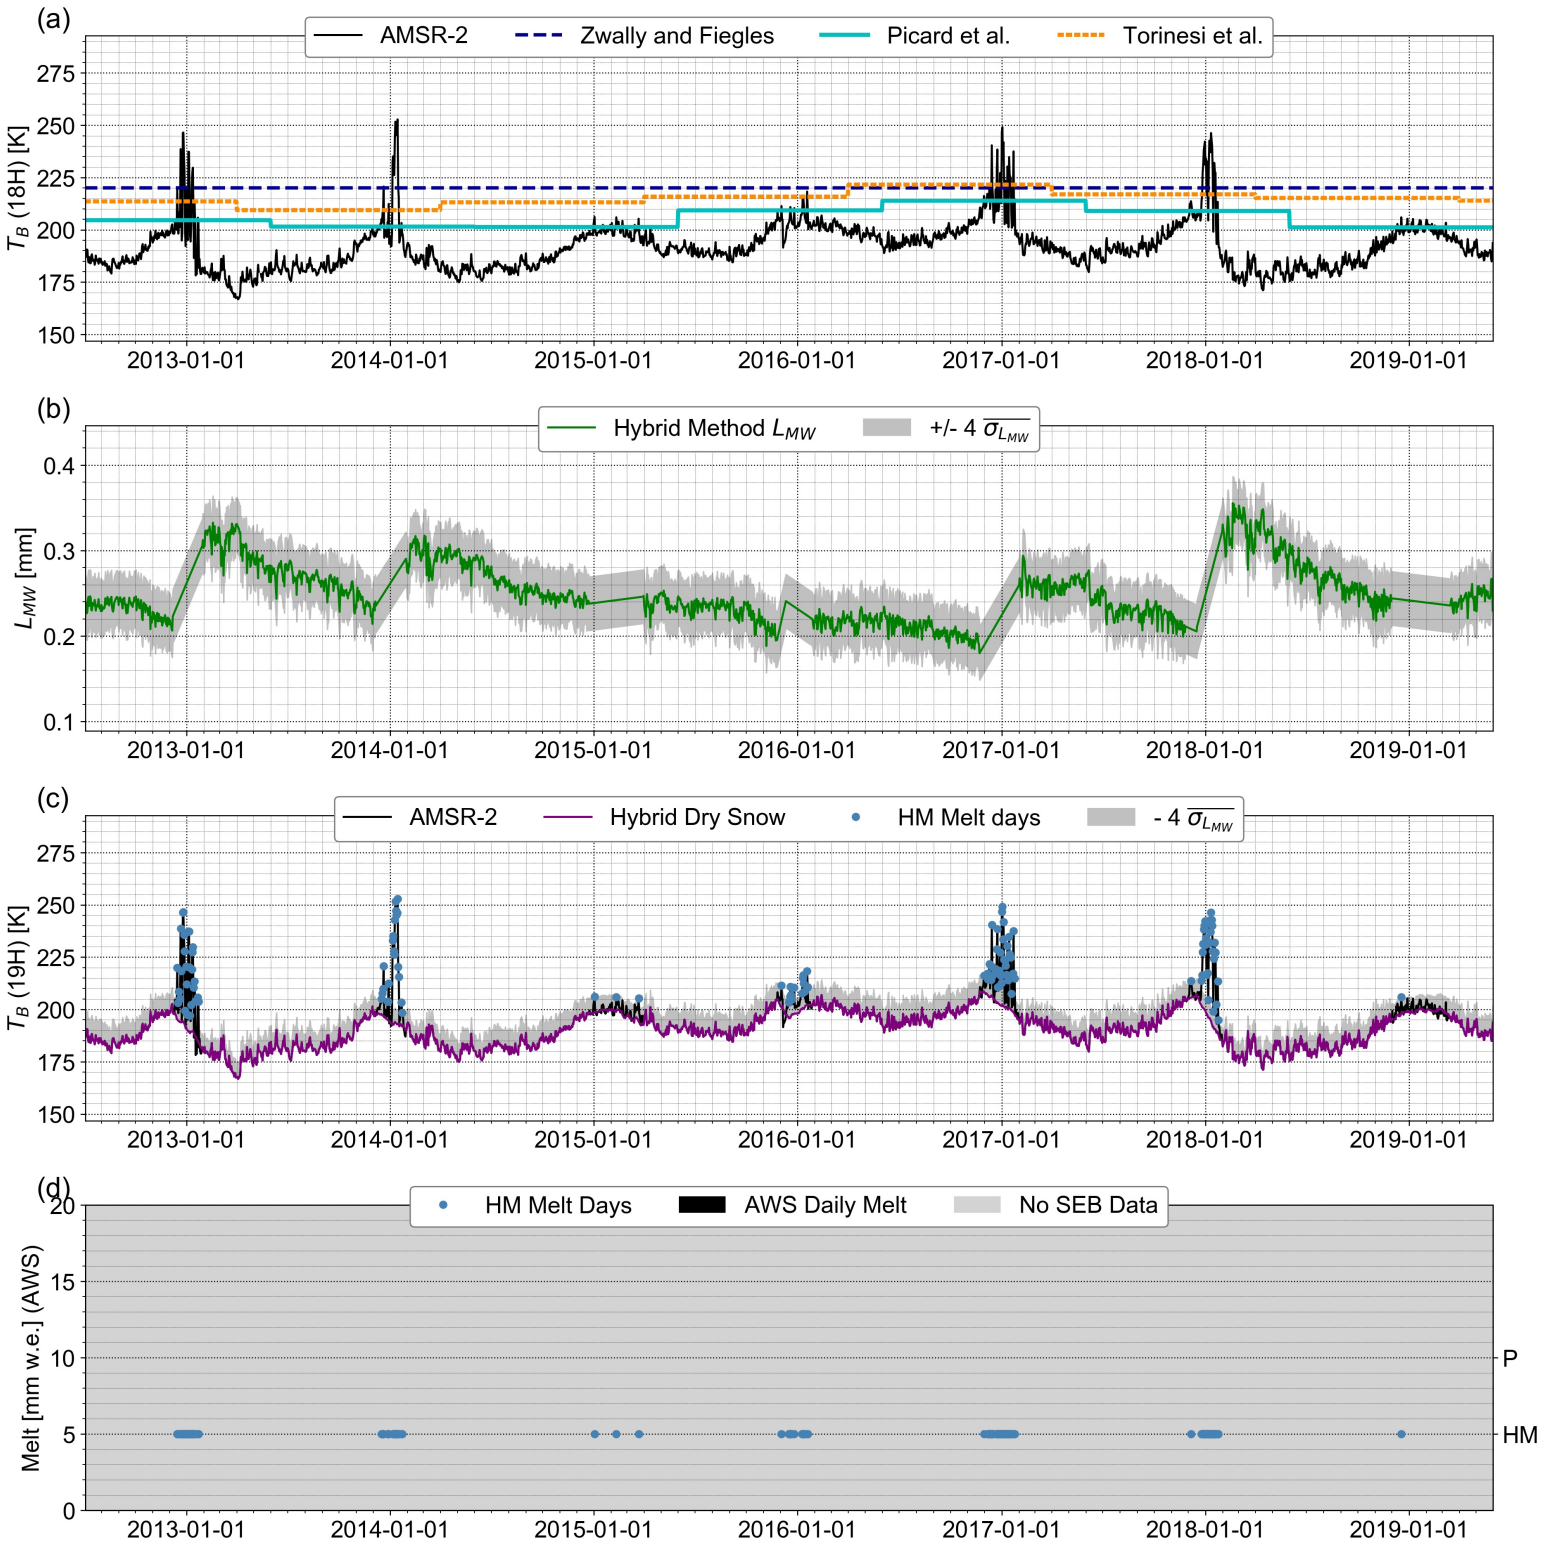

Site: AWS 5, Channel: 18H

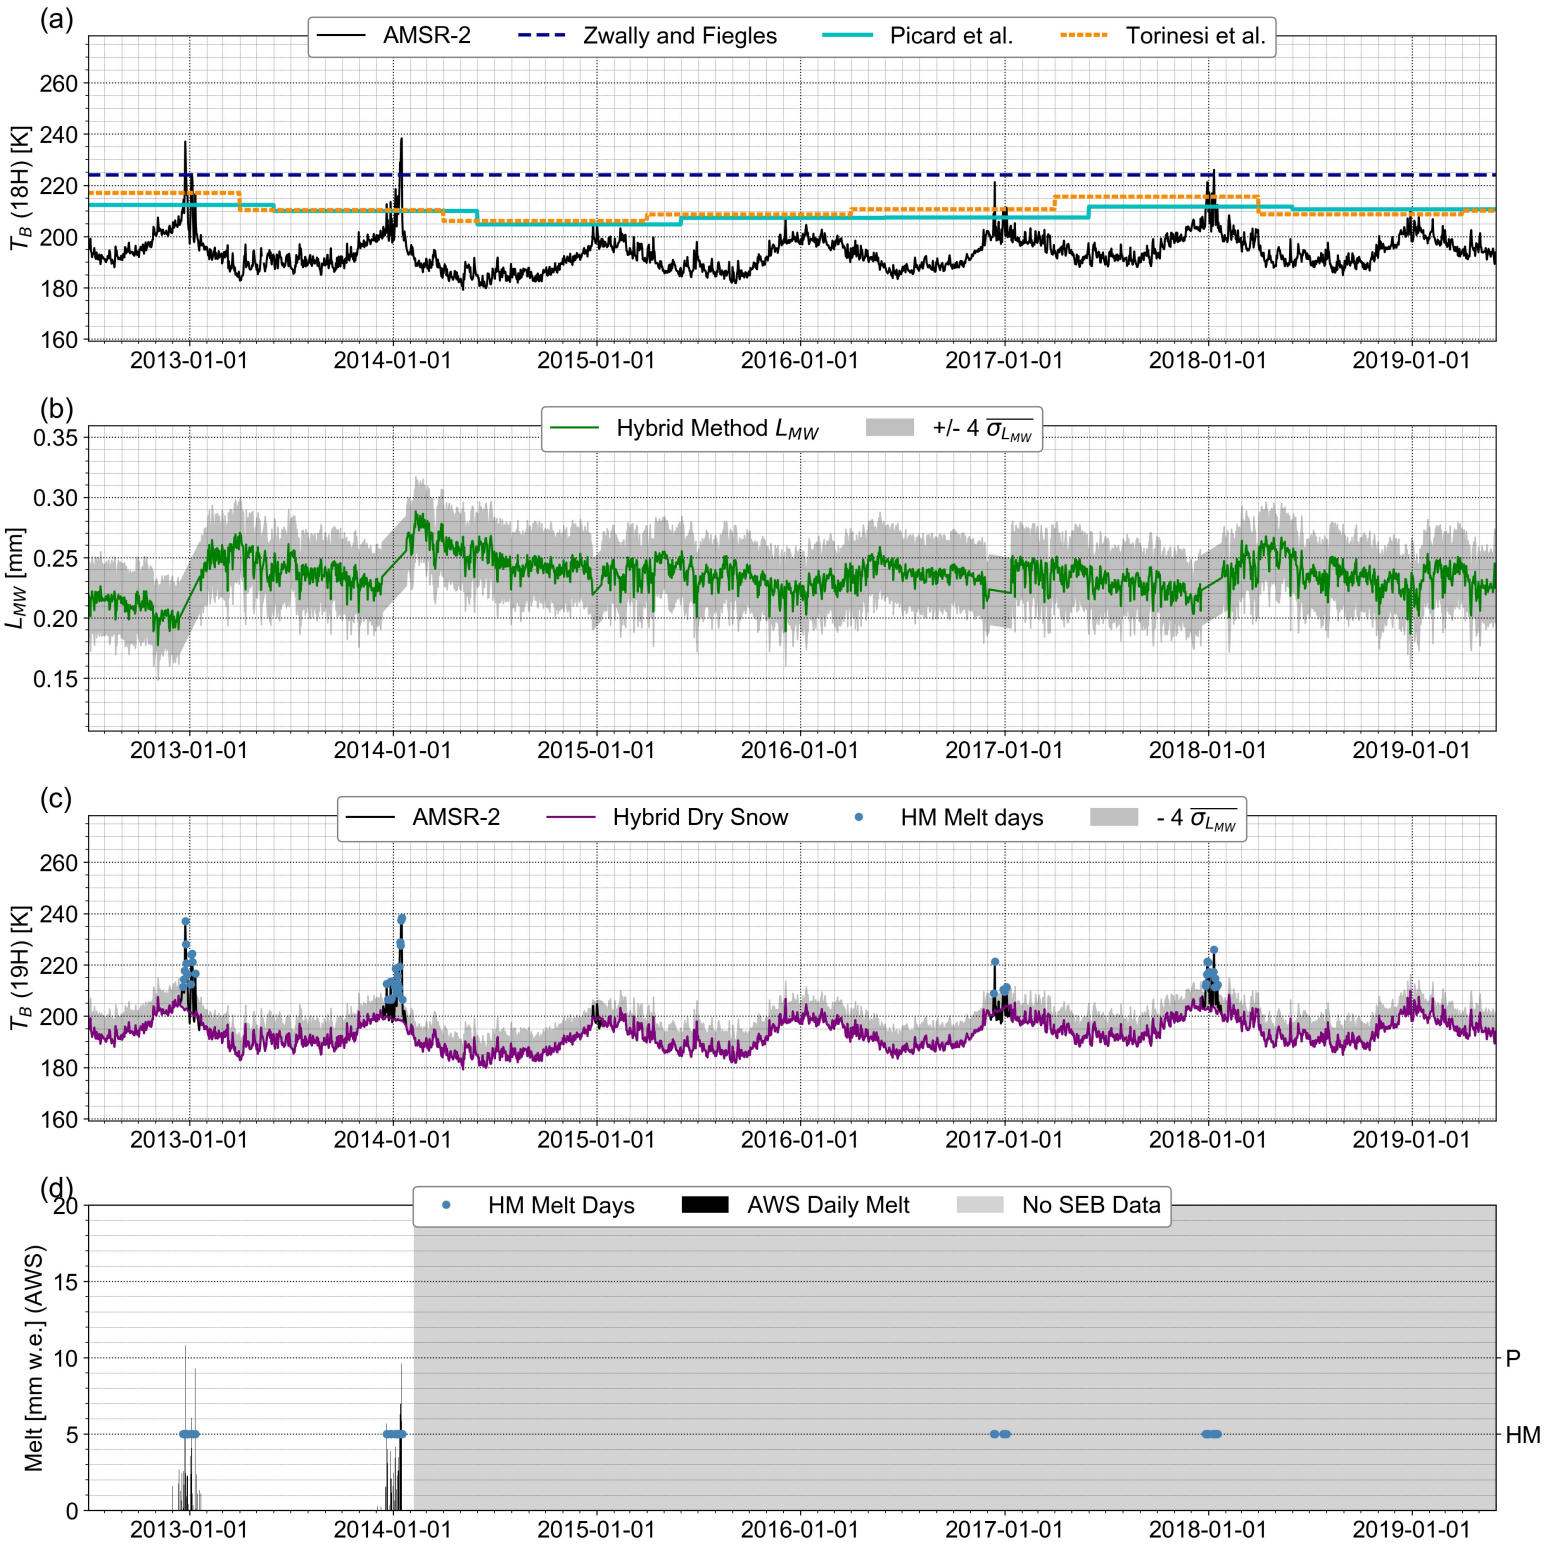



Site: AWS16 (Bias Corrected), Channel: 18V

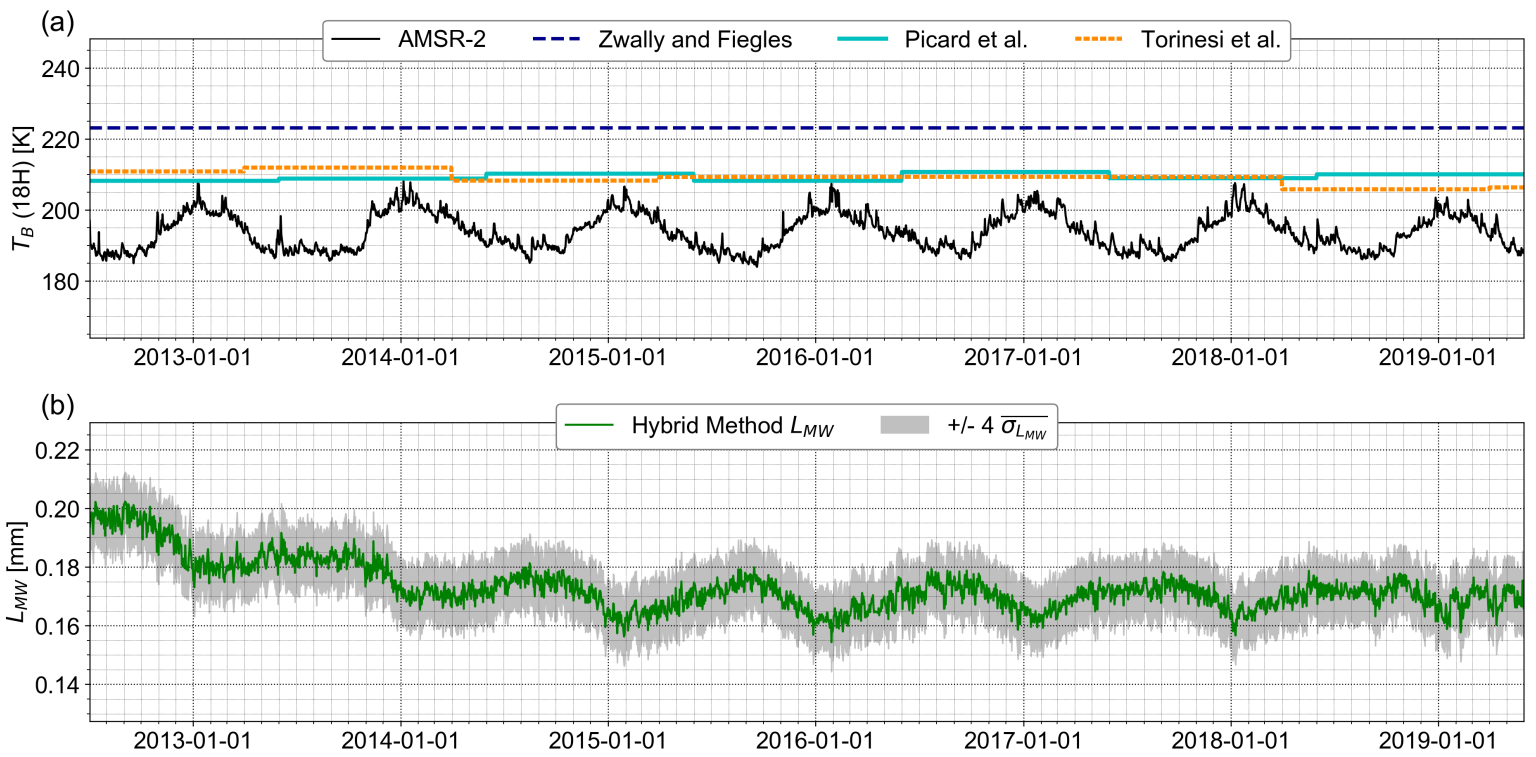

Site: Dome C (Bias Corrected), Channel: 18V

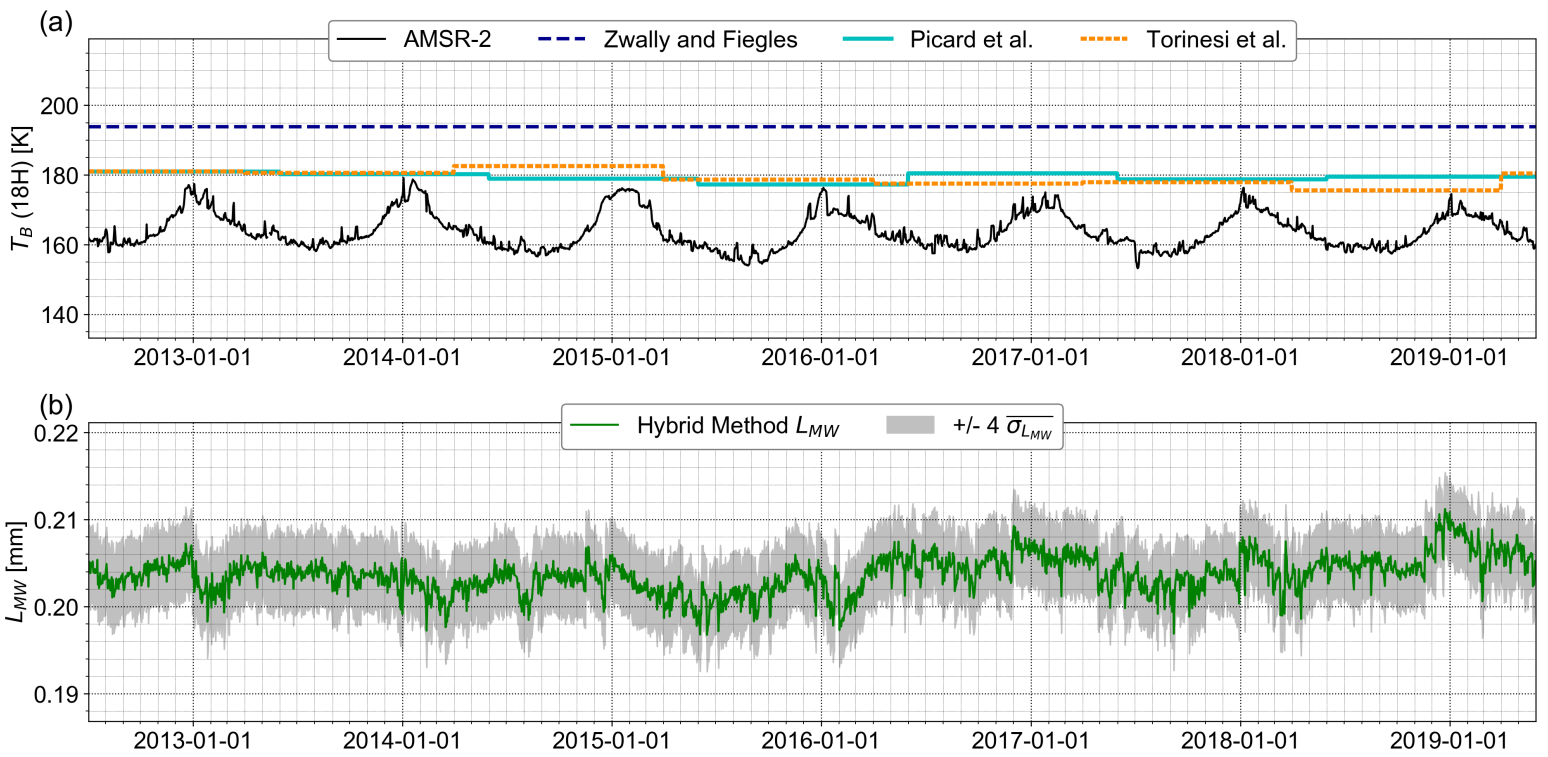



Site: AWS 19, Channel: 18V

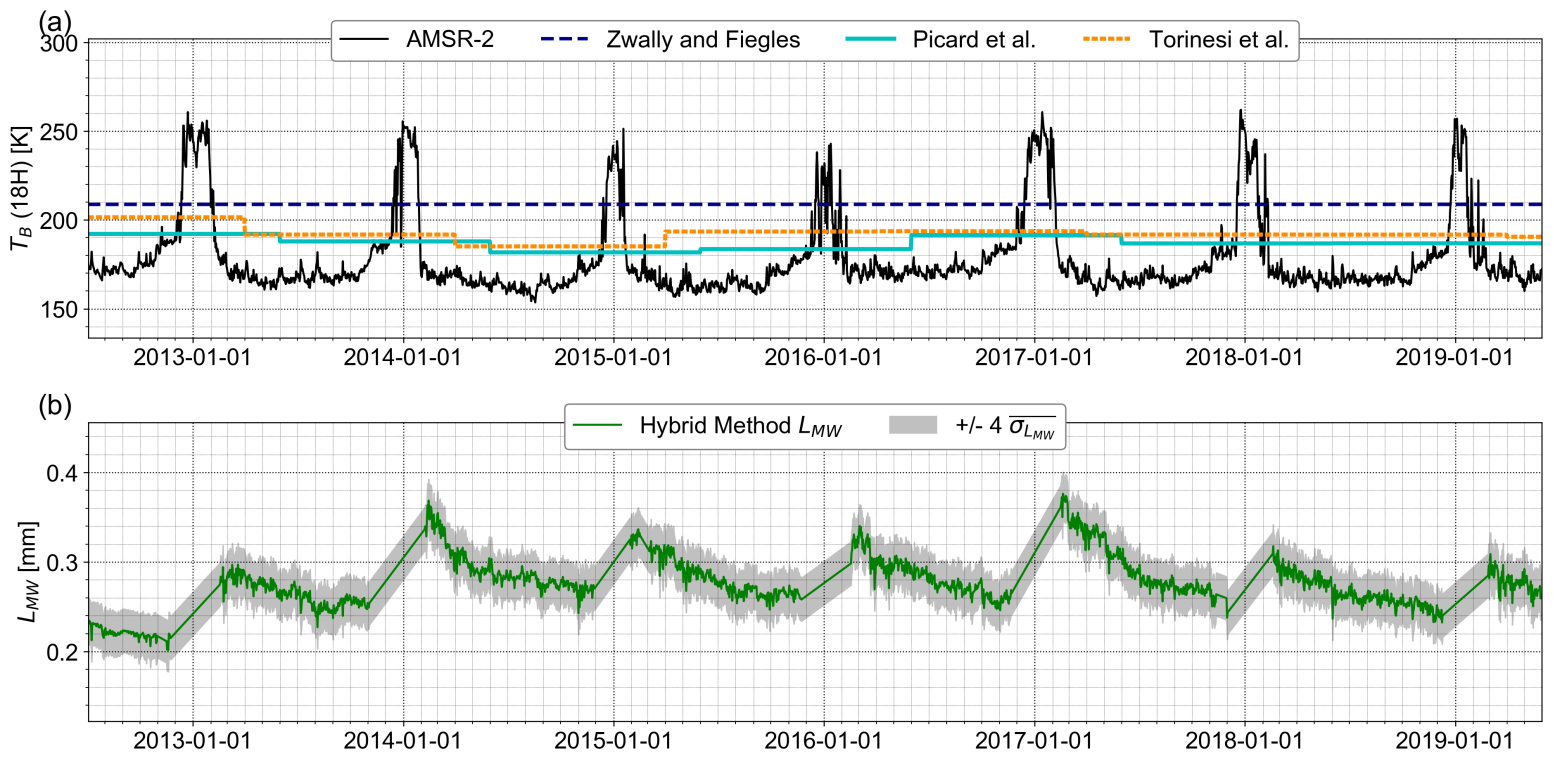

Site: AWS 15, Channel: 18V

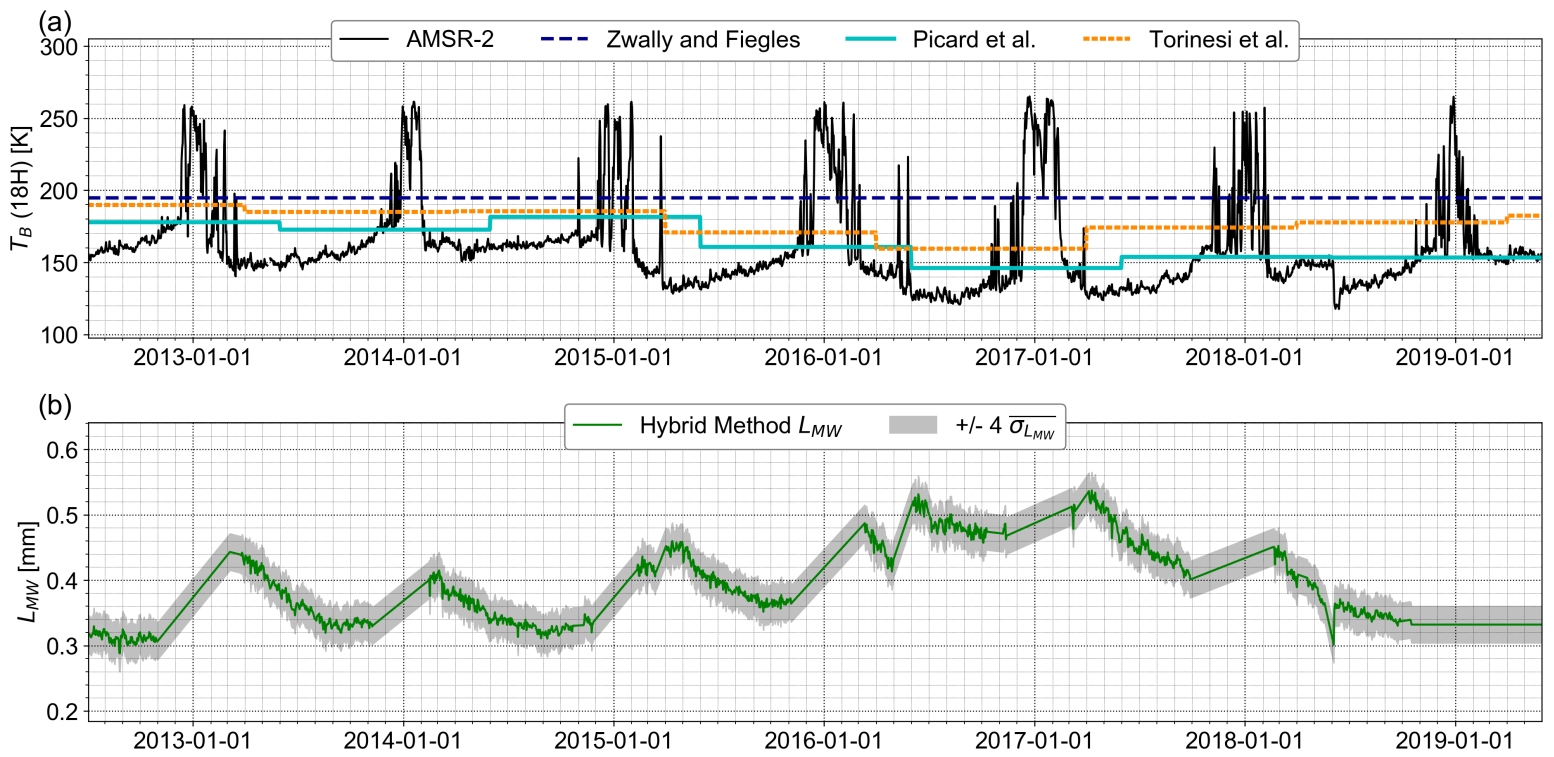

Site: AWS 16, Channel: 18V

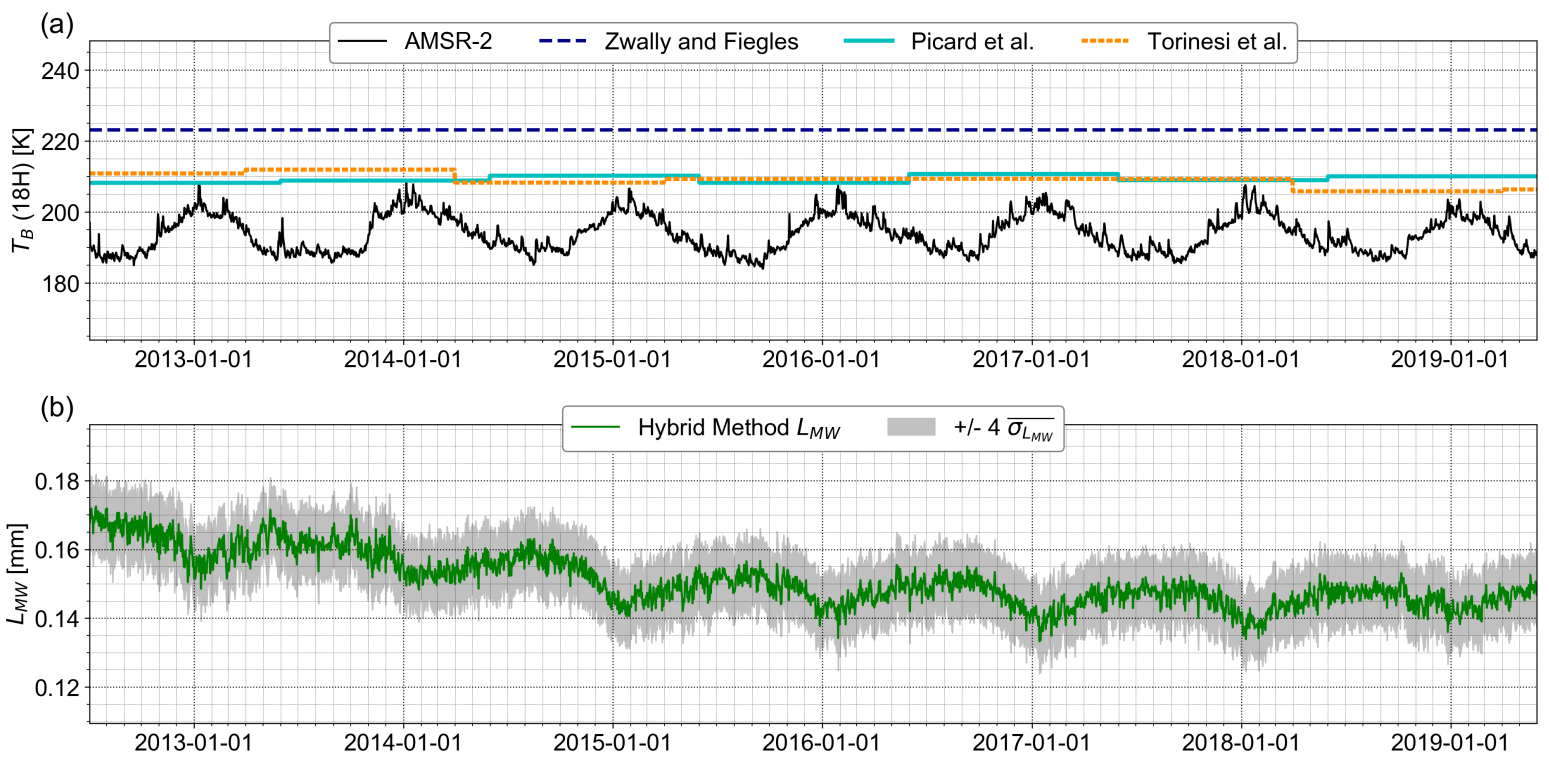

Site: Kohnen, Channel: 18V

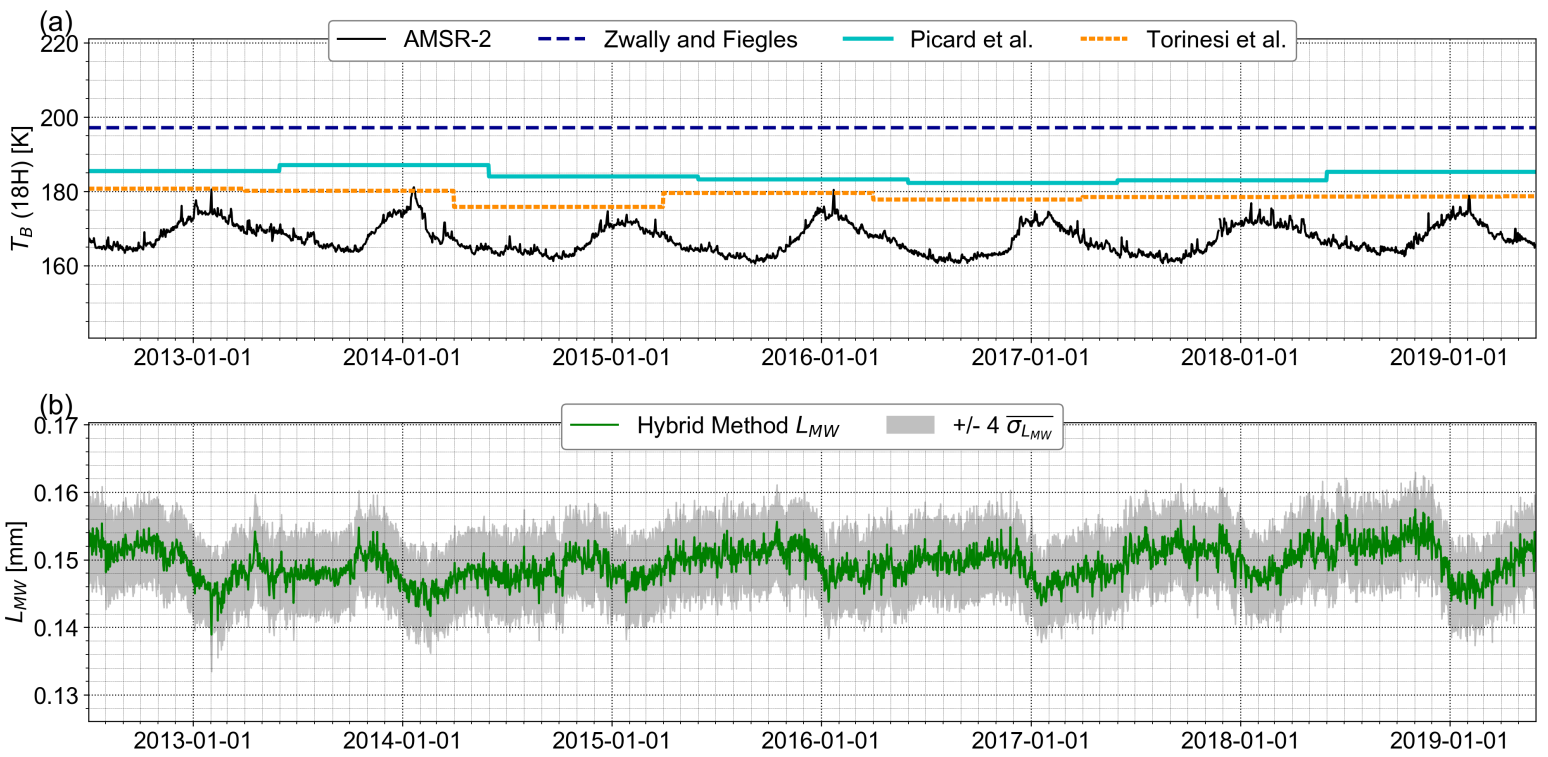

Site: Point Barnola, Channel: 18V

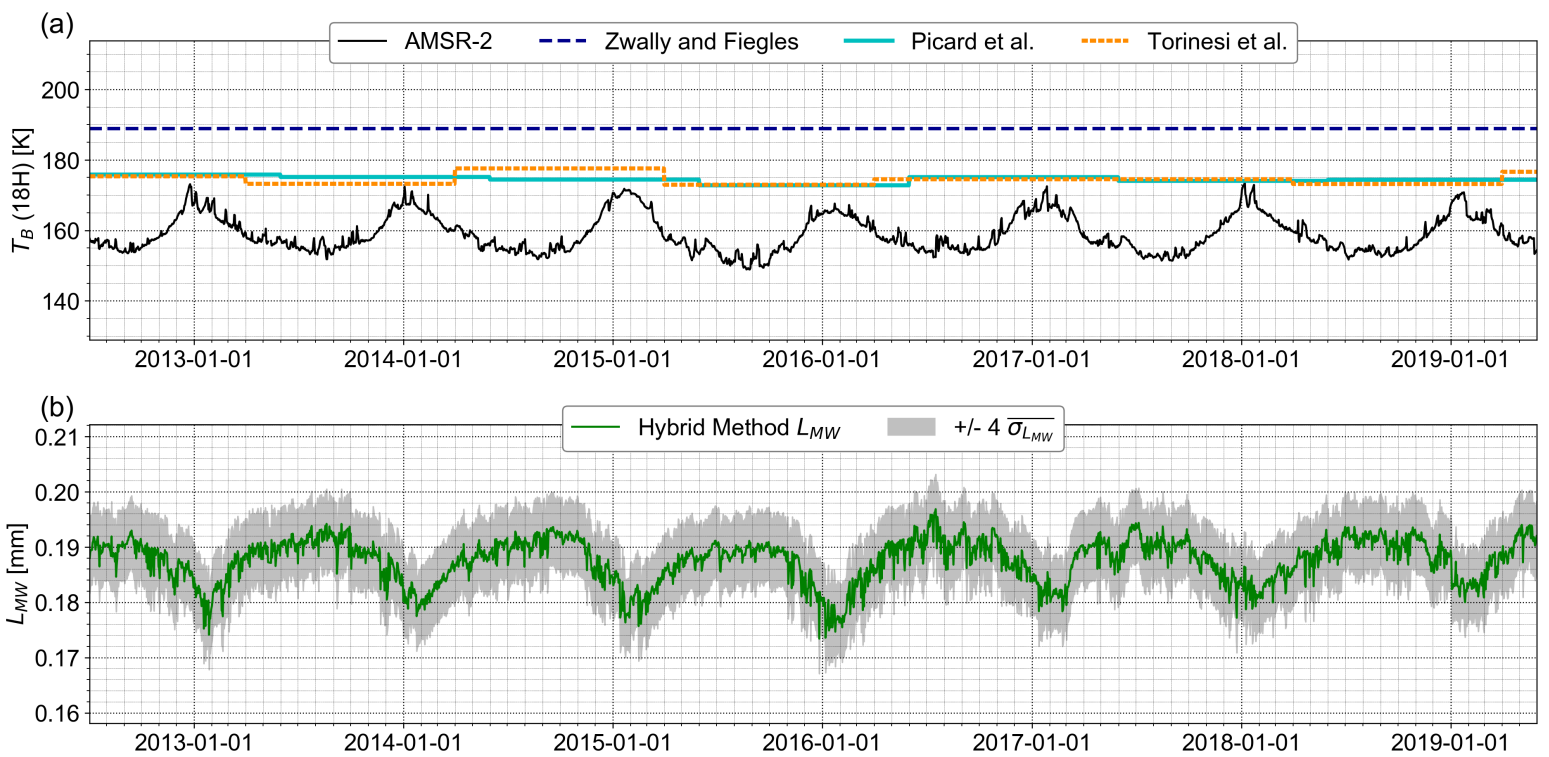

Site: Dome C, Channel: 18V

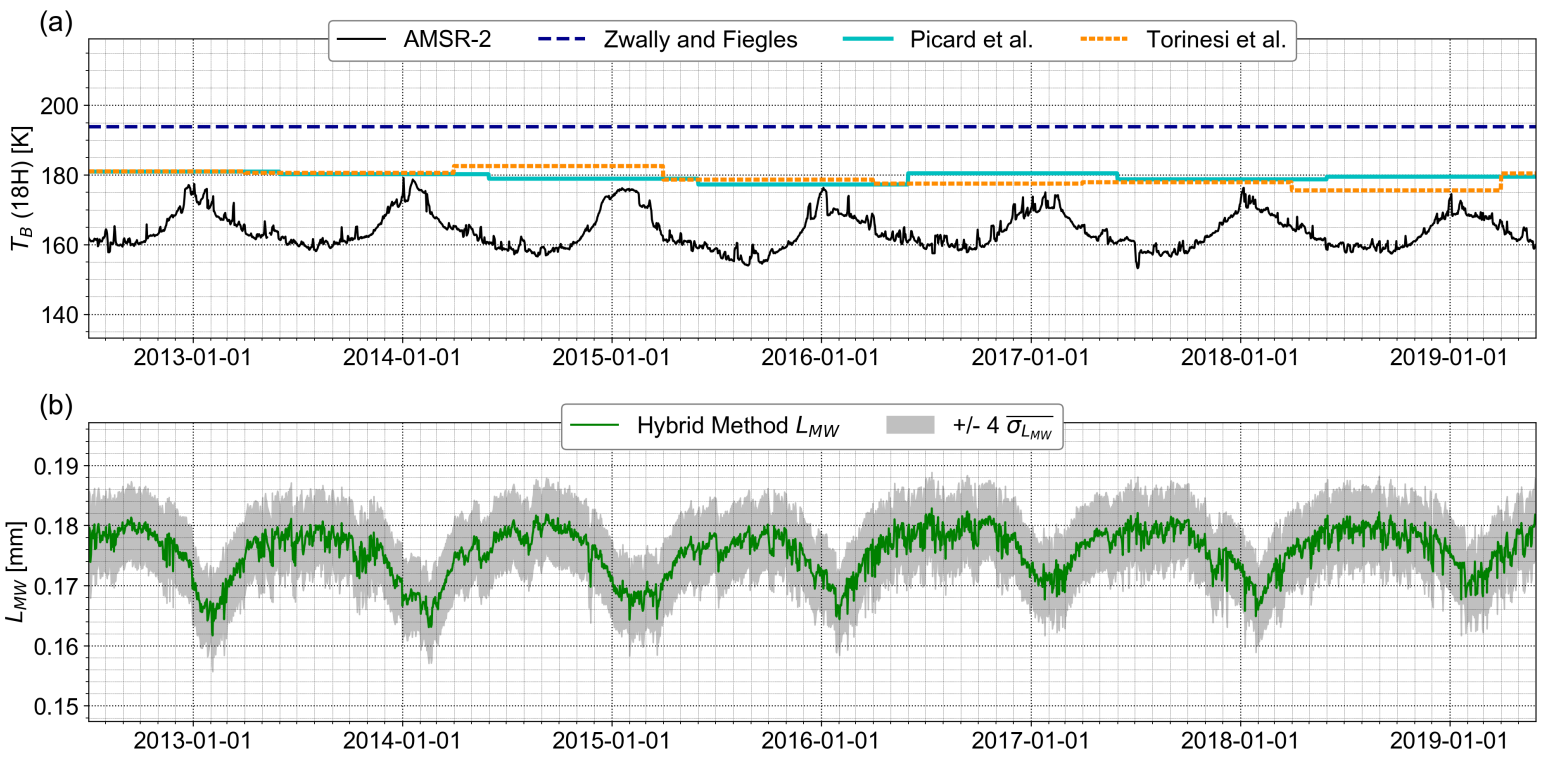

Site: AWS 17, Channel: 18V

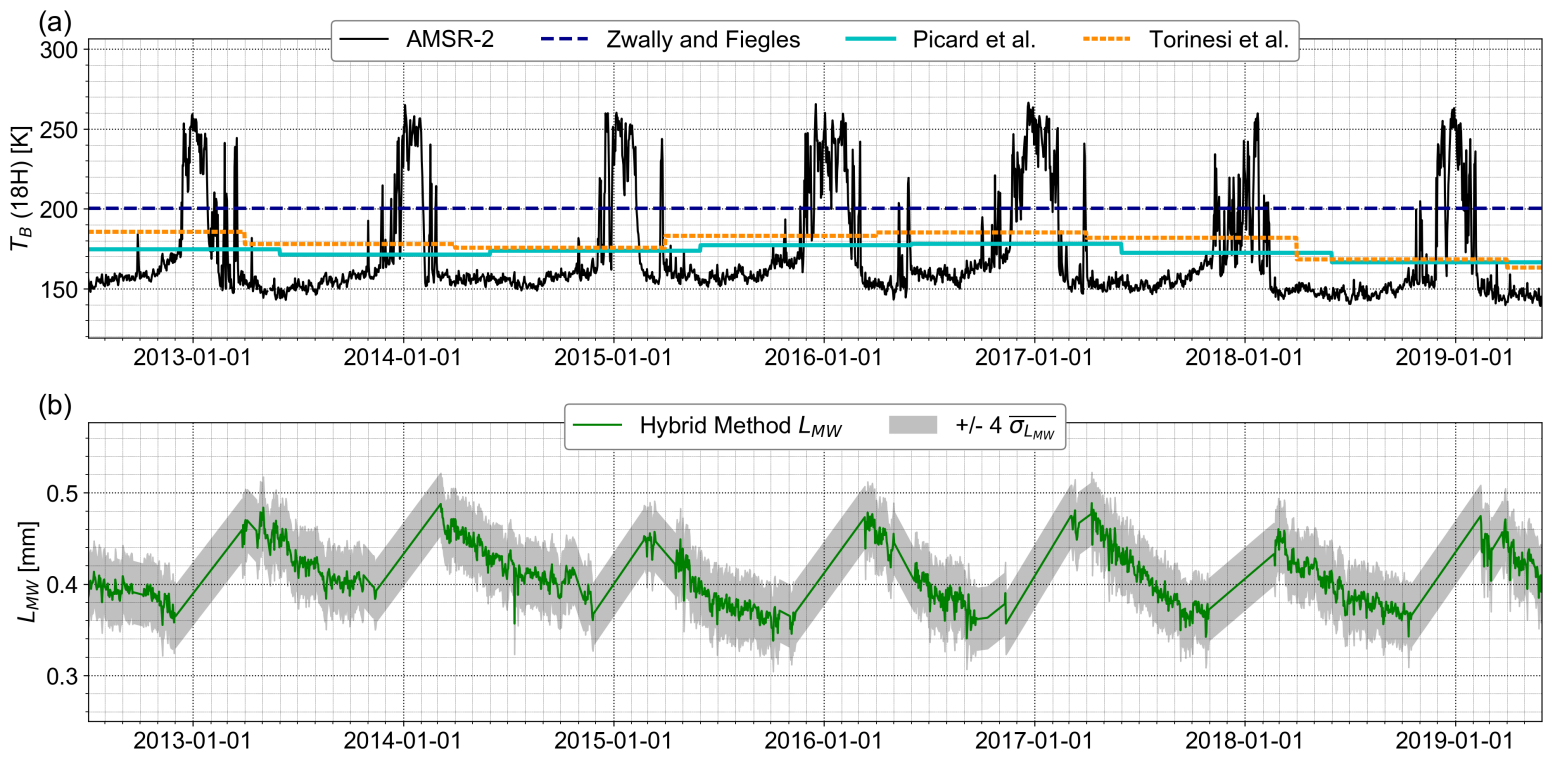

Site: AWS 14, Channel: 18V

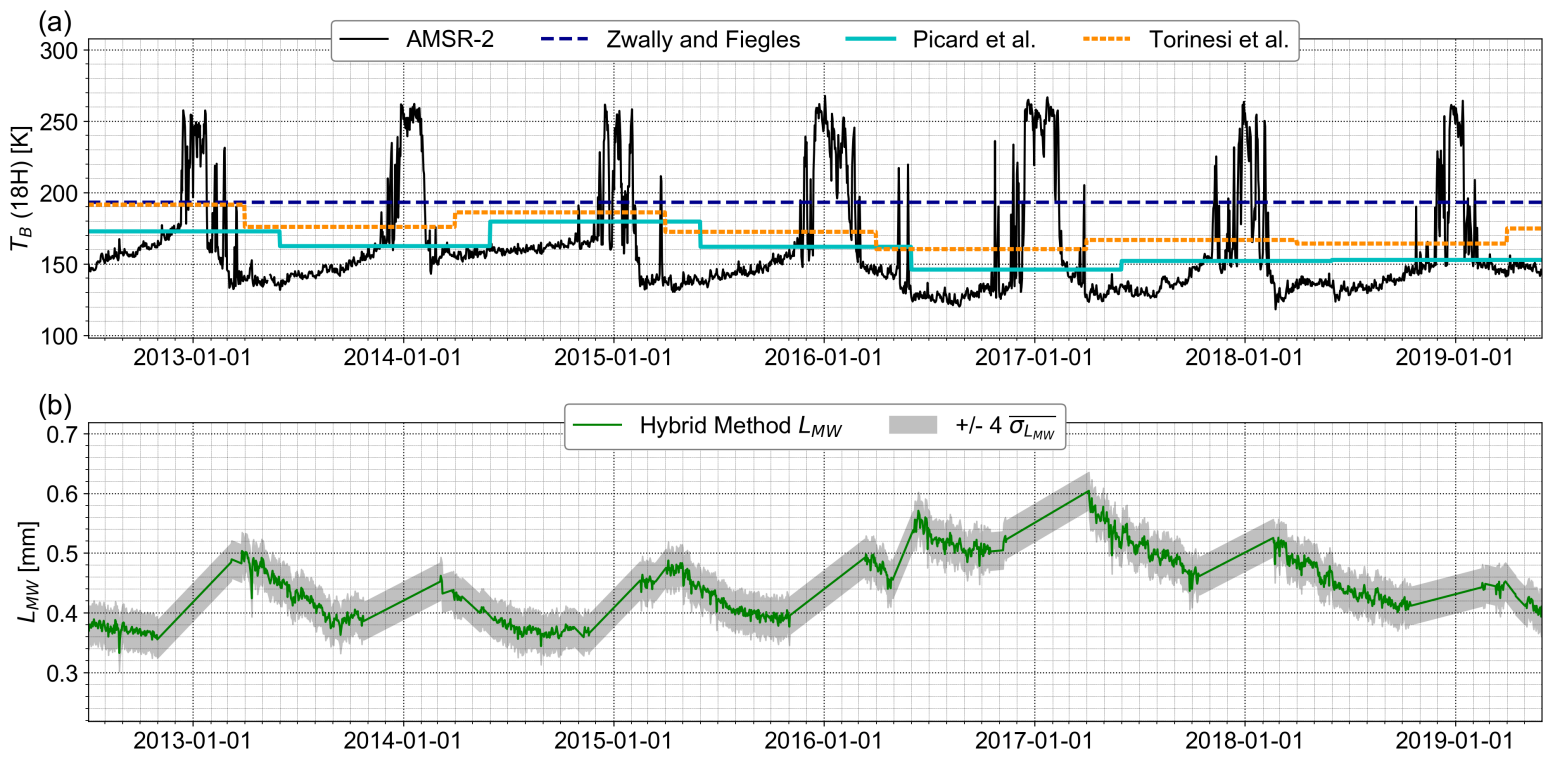



Site: AWS 6, Channel: 18V

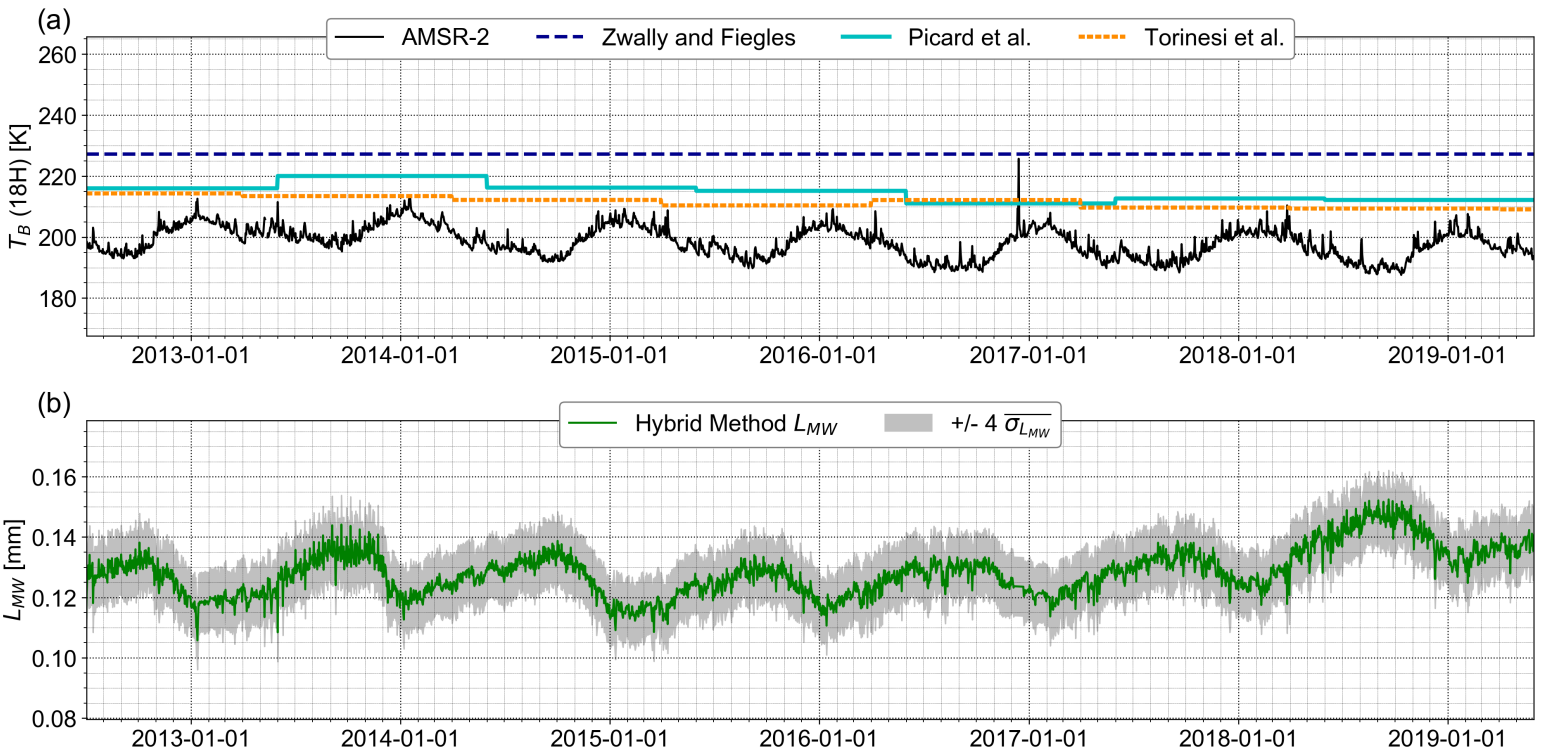

Site: AWS 11, Channel: 18V

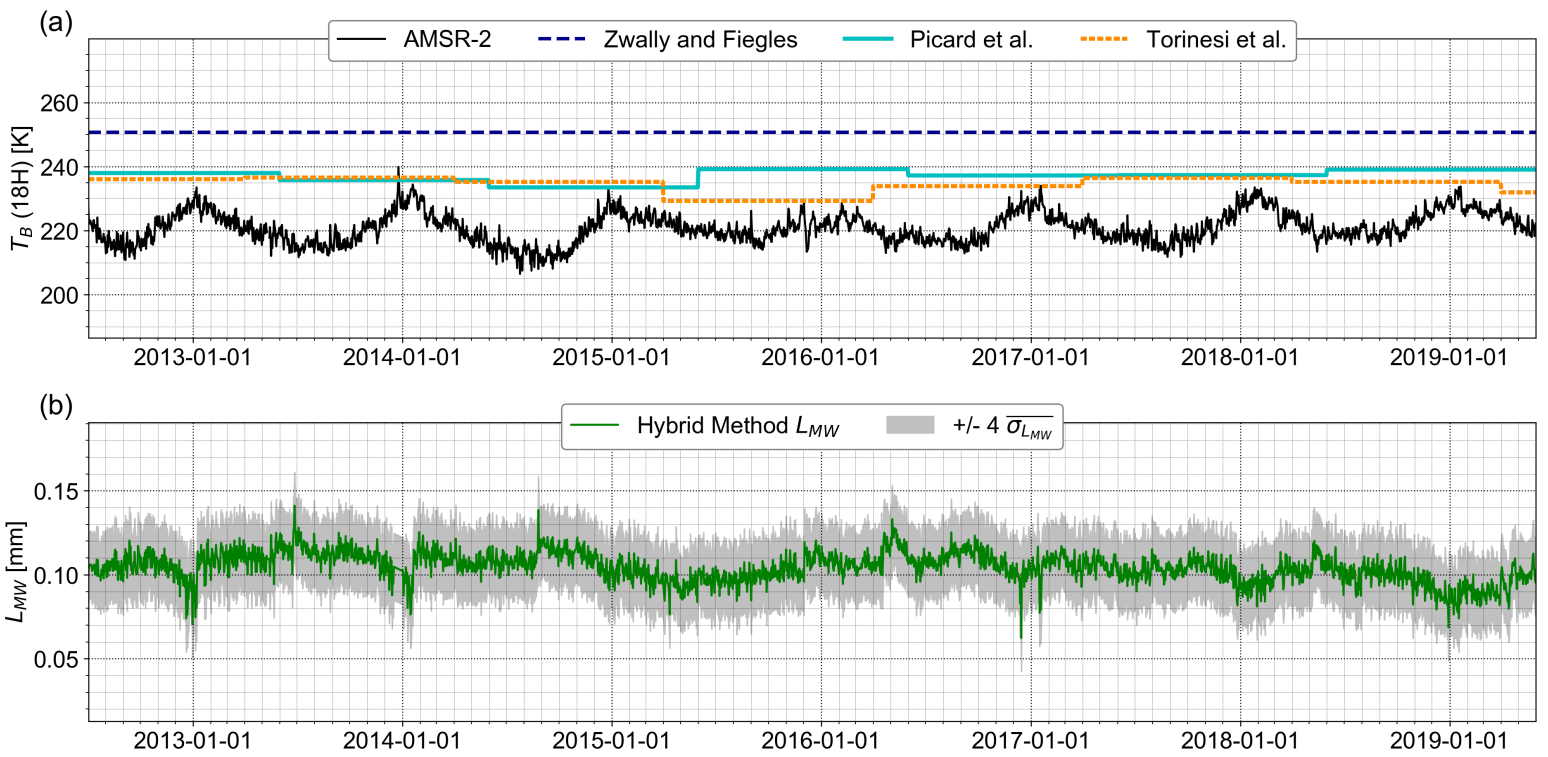

Site: AWS 4, Channel: 18V

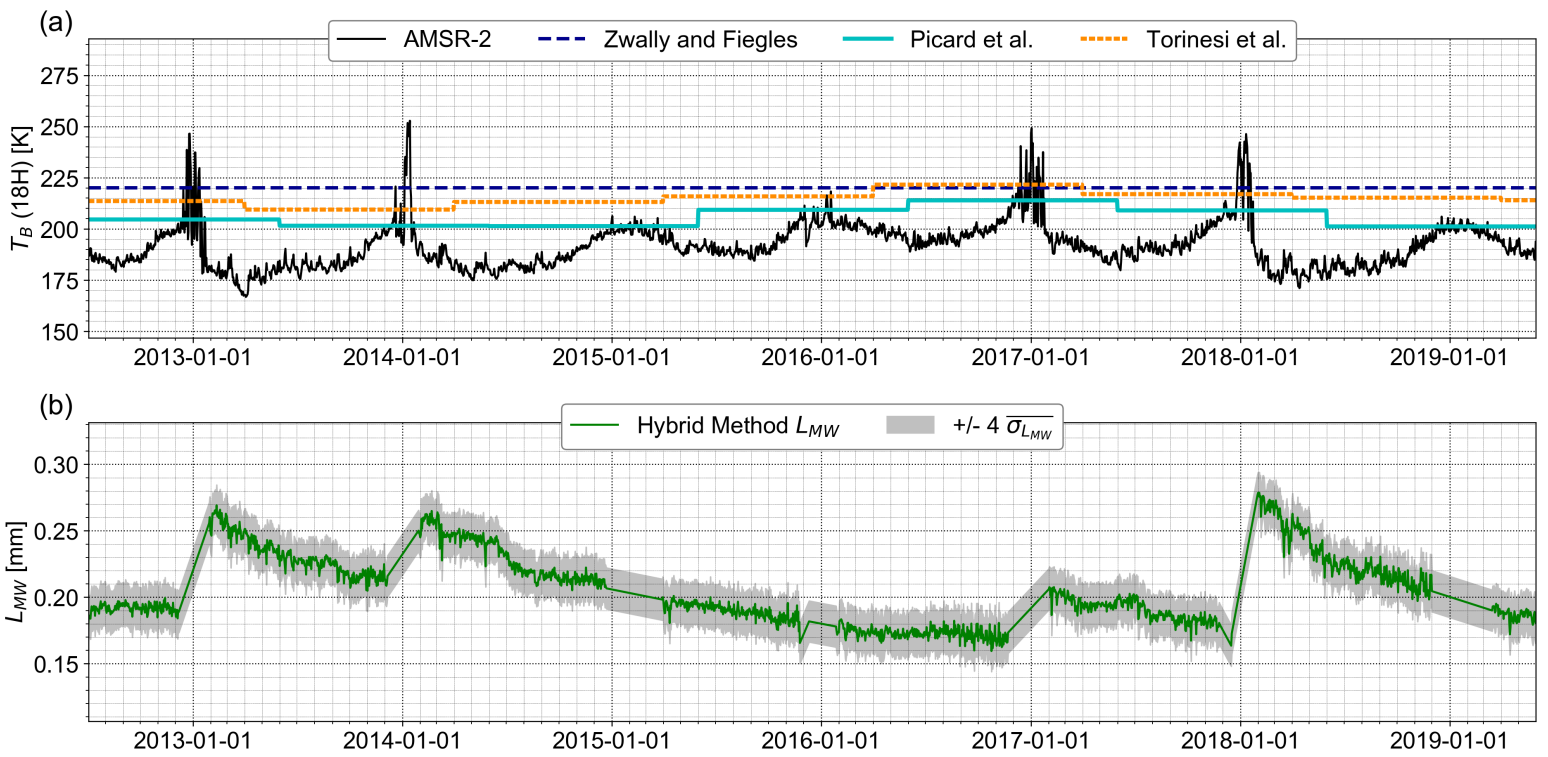

Site: AWS 5, Channel: 18V

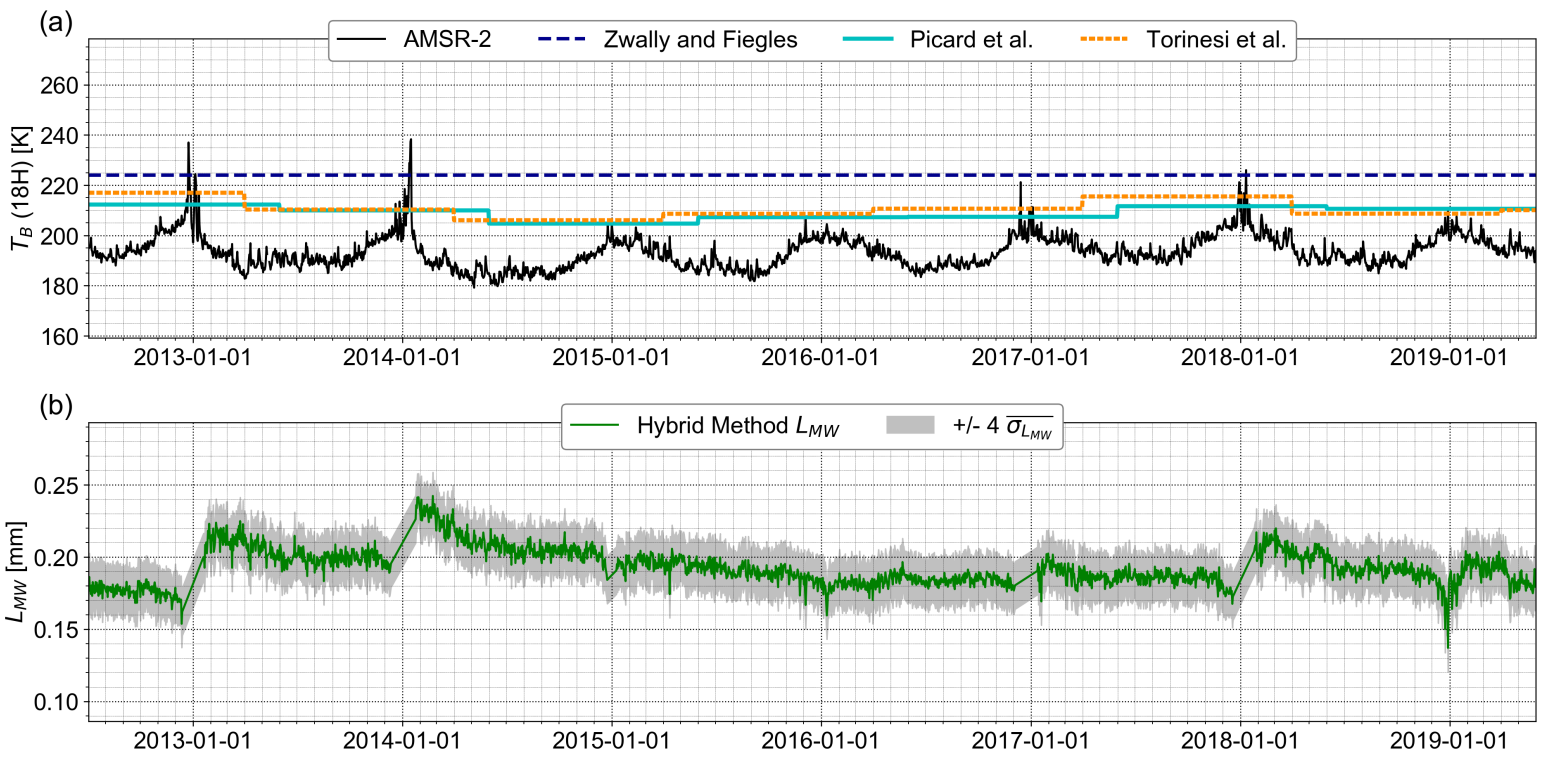



Site: AWS 18, Channel: 18V

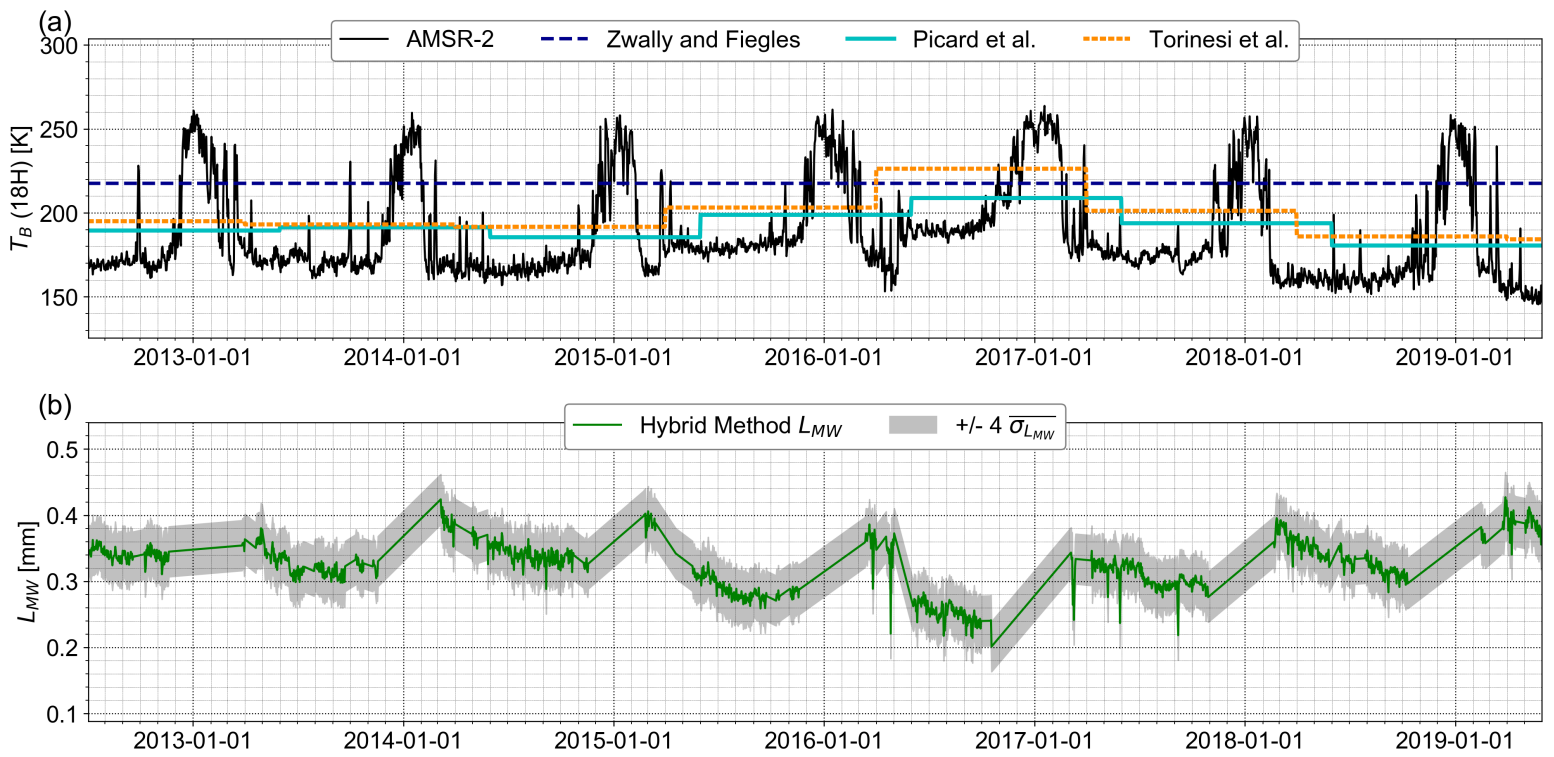

Site: AWS 18, Channel: 18H

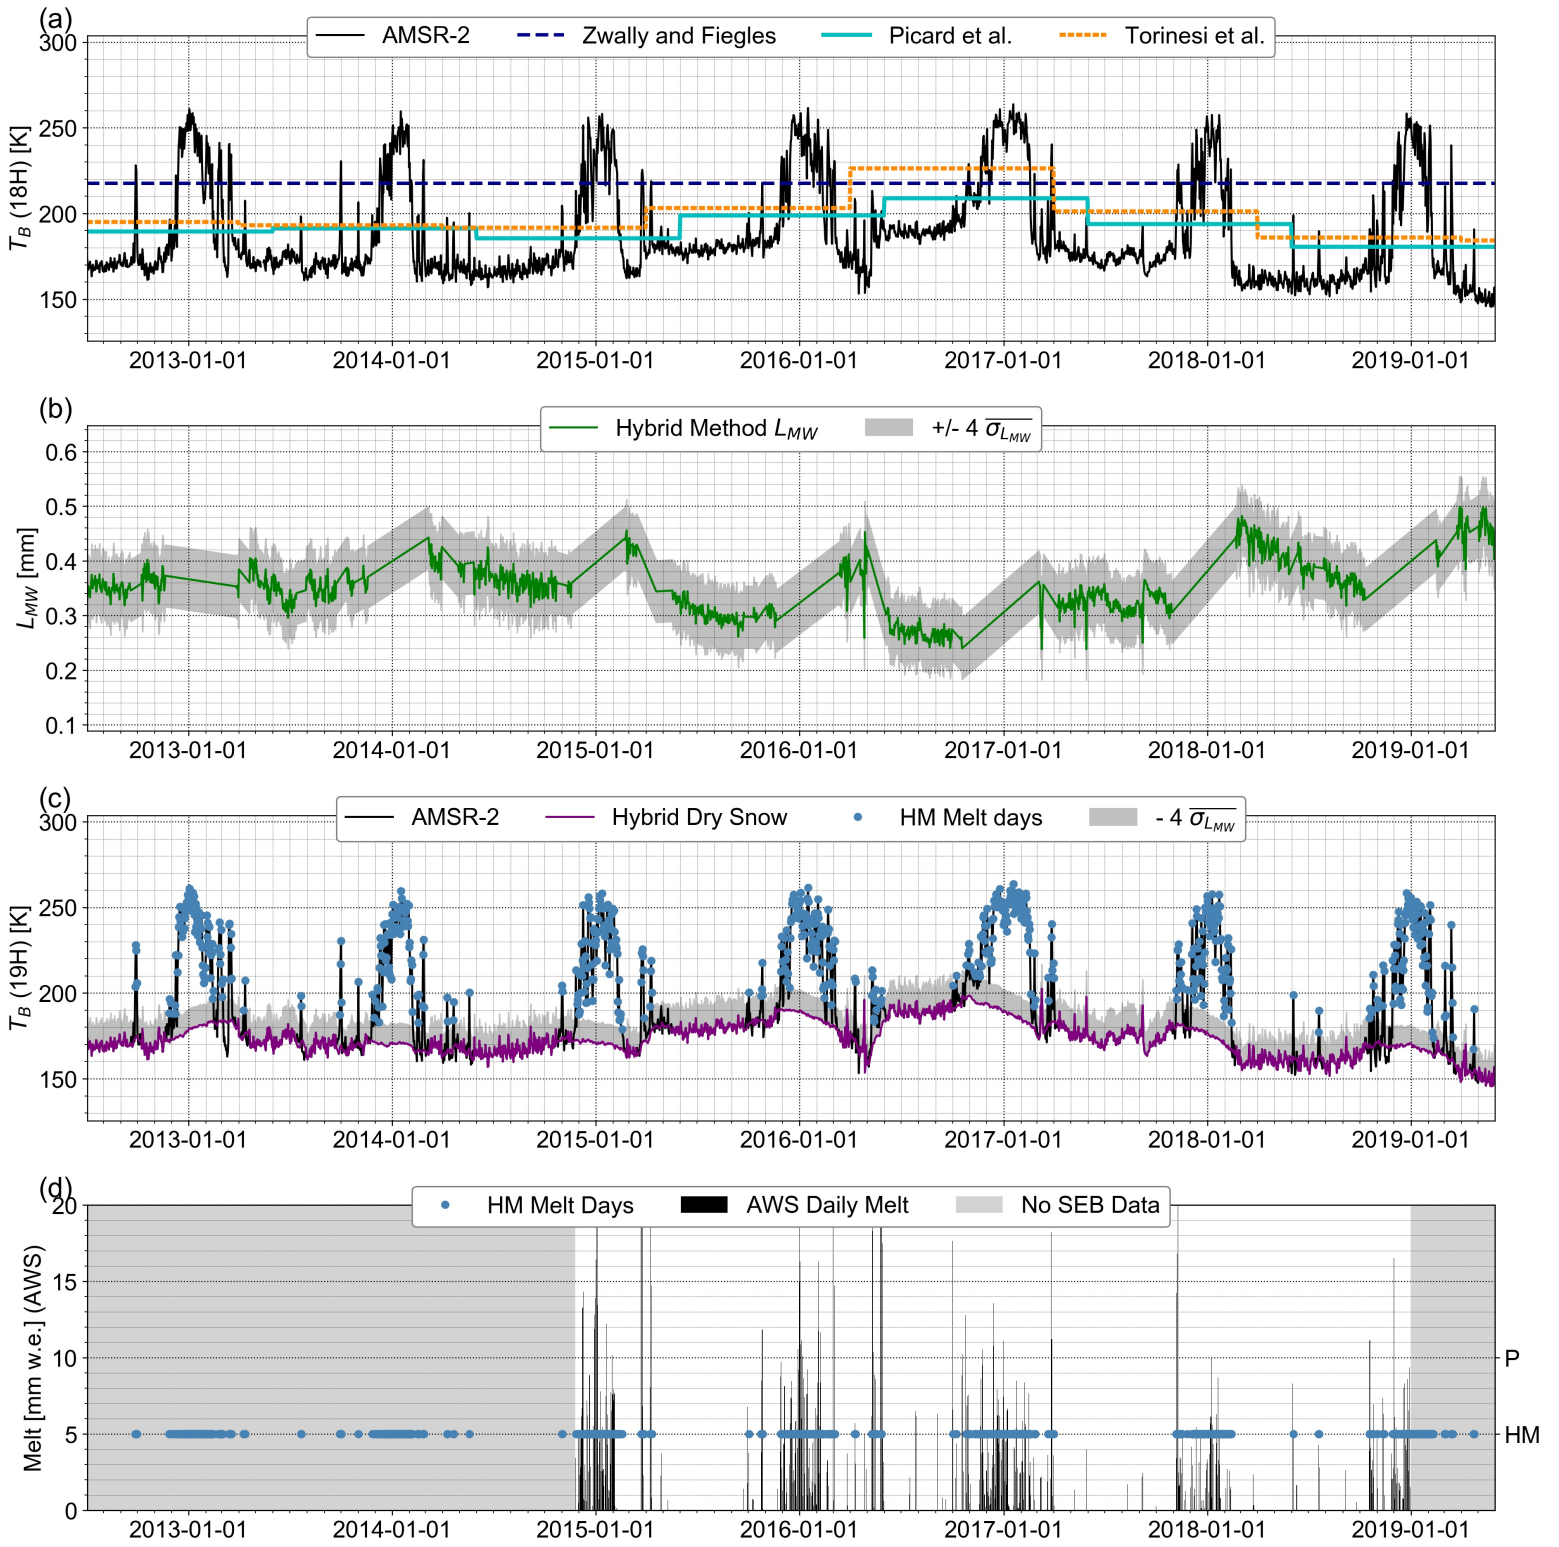

Site: AWS16 (Bias Corrected), Channel: 18V



Site: Dome C (Bias Corrected), Channel: 18V



Site: AWS 19, Channel: 18V





Site: AWS 15, Channel: 18V



Site: AWS 16, Channel: 18V

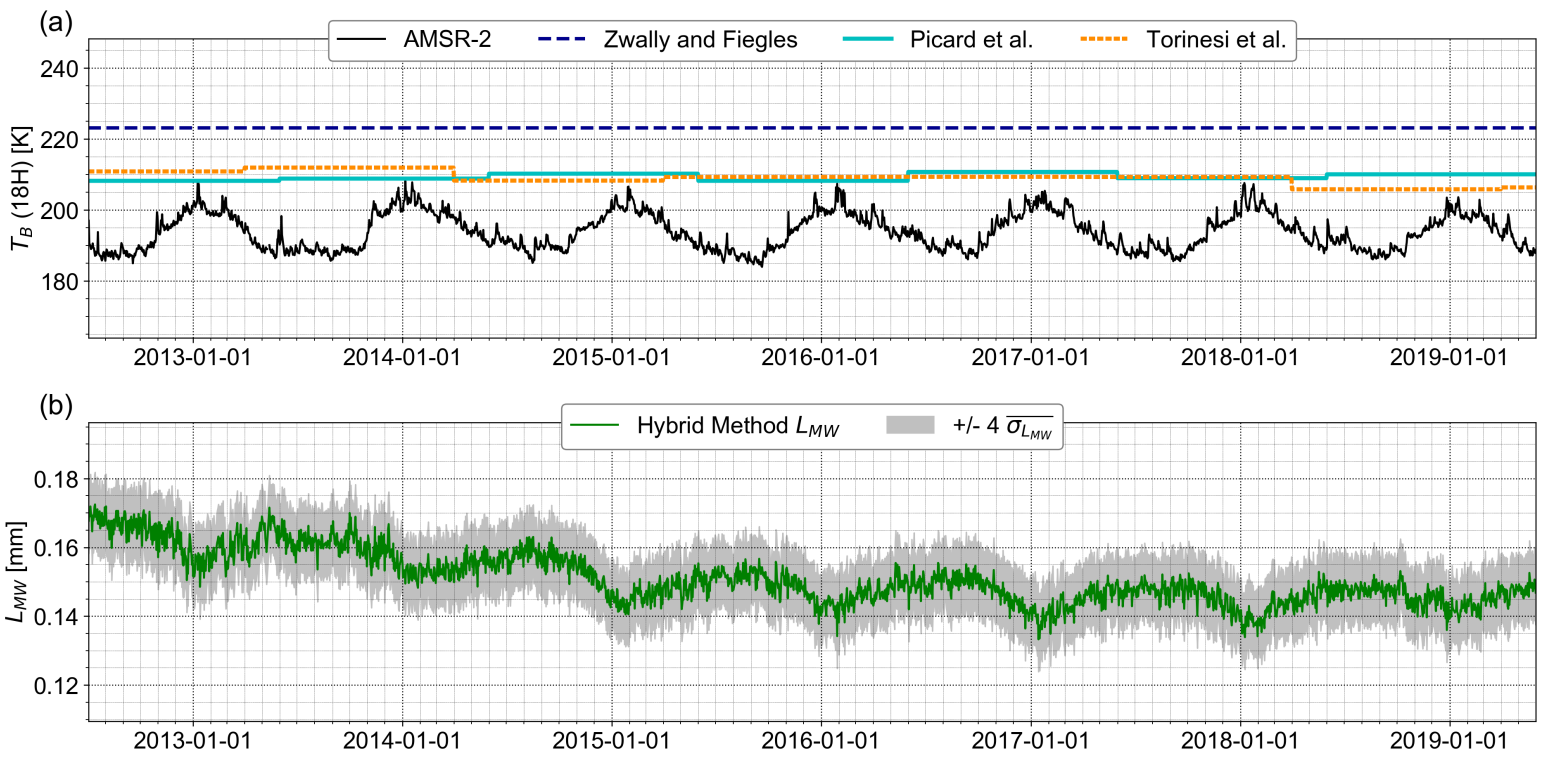

Site: Kohnen, Channel: 18V



Site: Point Barnola, Channel: 18V

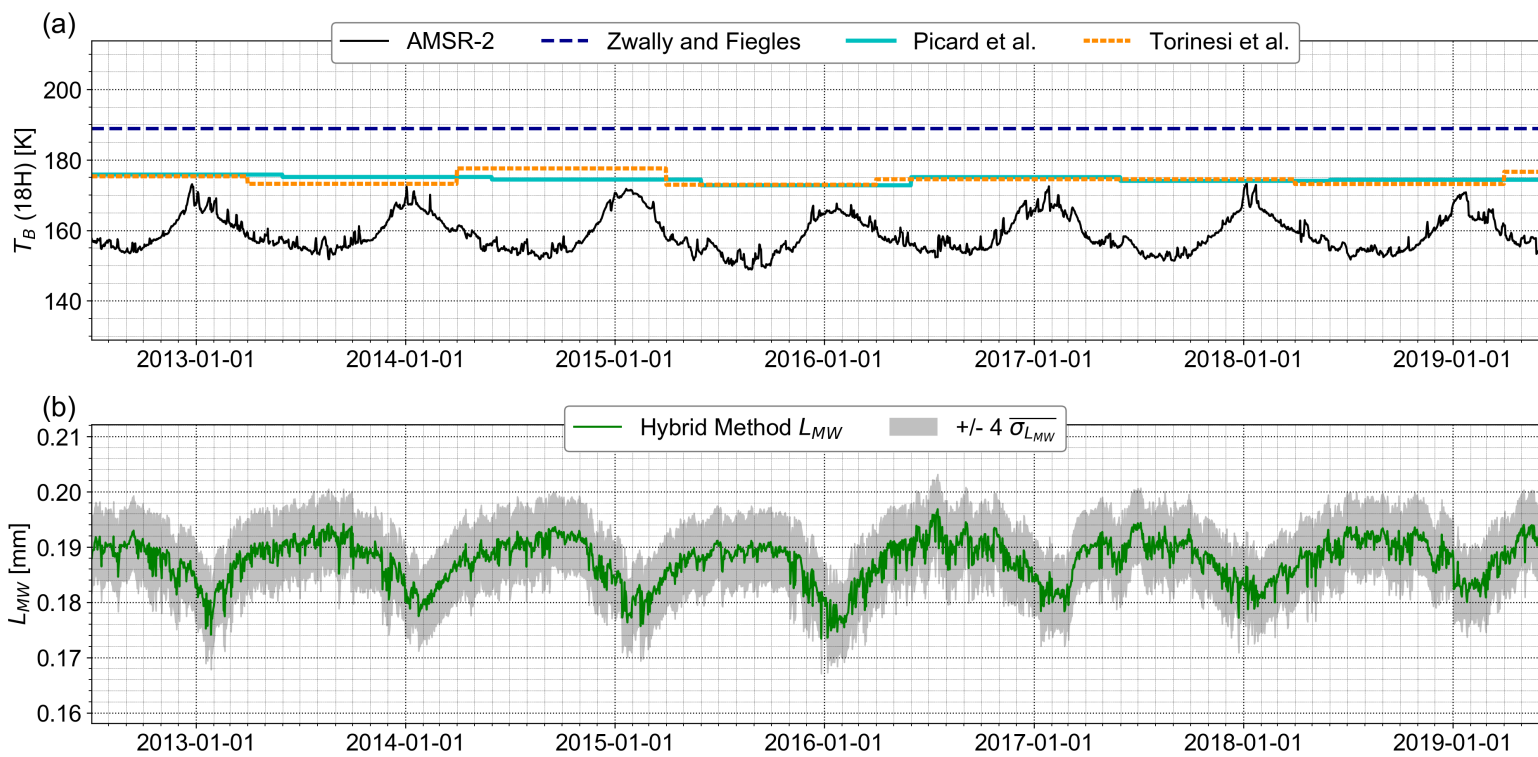

Site: Dome C, Channel: 18V





Site: AWS 17, Channel: 18V



Site: AWS 14, Channel: 18V



Site: AWS 6, Channel: 18V

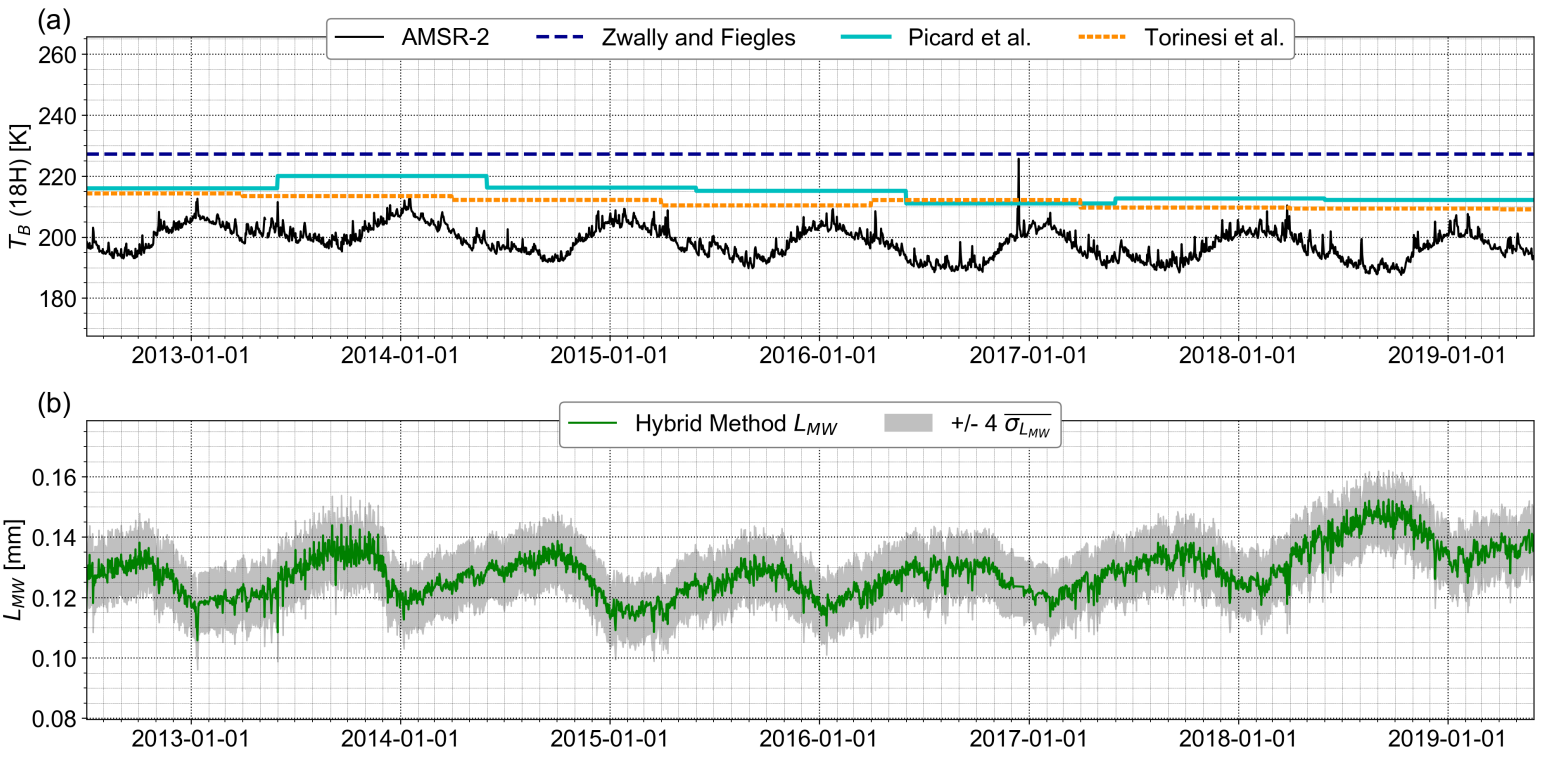

Site: AWS 11, Channel: 18V



Site: AWS 4, Channel: 18V





Site: AWS 5, Channel: 18V



Site: AWS 18, Channel: 18V



Supplement: Supplementary file 1 [file tc-18-3613-2024-supplement.pdf]
